# Supplementary material for: Design of Biphenyl-Substituted Diarylpyrimidines with a Cyanomethyl Linker as HIV-1 NNRTIs via a Molecular Hybridization Strategy
Source: MDPI journal article supplement (doi:10.3390/molecules25051050), 2020-02-26
Supplement: s1 [file s1]

# Discovery of novel biphenyl-substituted diarylpyrimidines with a cyanomethyl linker as HIV-1 NNRTIs by a molecular hybridization strategy Design of Biphenyl-Substituted Diarylpyrimidines with a Cyanomethyl Linker as HIV-1 NNRTIs via a Molecular Hybridization Strategy

Yuan Lei <sup>1,†</sup>, Sheng Han <sup>2,3,†</sup>, Yang Yang <sup>1</sup>, Christophe Pannecouque <sup>4</sup>, Erik De Clercq <sup>4</sup>, Chunlin Zhuang <sup>2,3,\*</sup> and Fen-Er Chen <sup>1,2,3,\*</sup>

<sup>1</sup> Sichuan Research Center for Drug Precision Industrial Technology, West China School of Pharmacy, Sichuan University, Chengdu 610041, China; smile\_leiyuan@163.com (Y.L.), y25571765@163.com (Y.Y.)

<sup>2</sup> Engineering Center of Catalysis and Synthesis for Chiral Molecules, Department of Chemistry, Fudan University, Shanghai 200433, China; hansheng8114593@163.com

<sup>3</sup> Shanghai Engineering Center of Industrial Asymmetric Catalysis for Chiral Drugs, Shanghai 200433, China

<sup>4</sup> Rega Institute for Medical Research, KU Leuven, Herestraat 49, B-3000 Leuven, Belgium; christophe.pannecouque@kuleuven.be (C.P.); erik.declercq@kuleuven.be (E.D.C.)

\* Correspondence: zclnathan@163.com (C.Z.), rfchen@fudan.edu.cn (F.-E.C.)

† These two authors contributed equally to this work

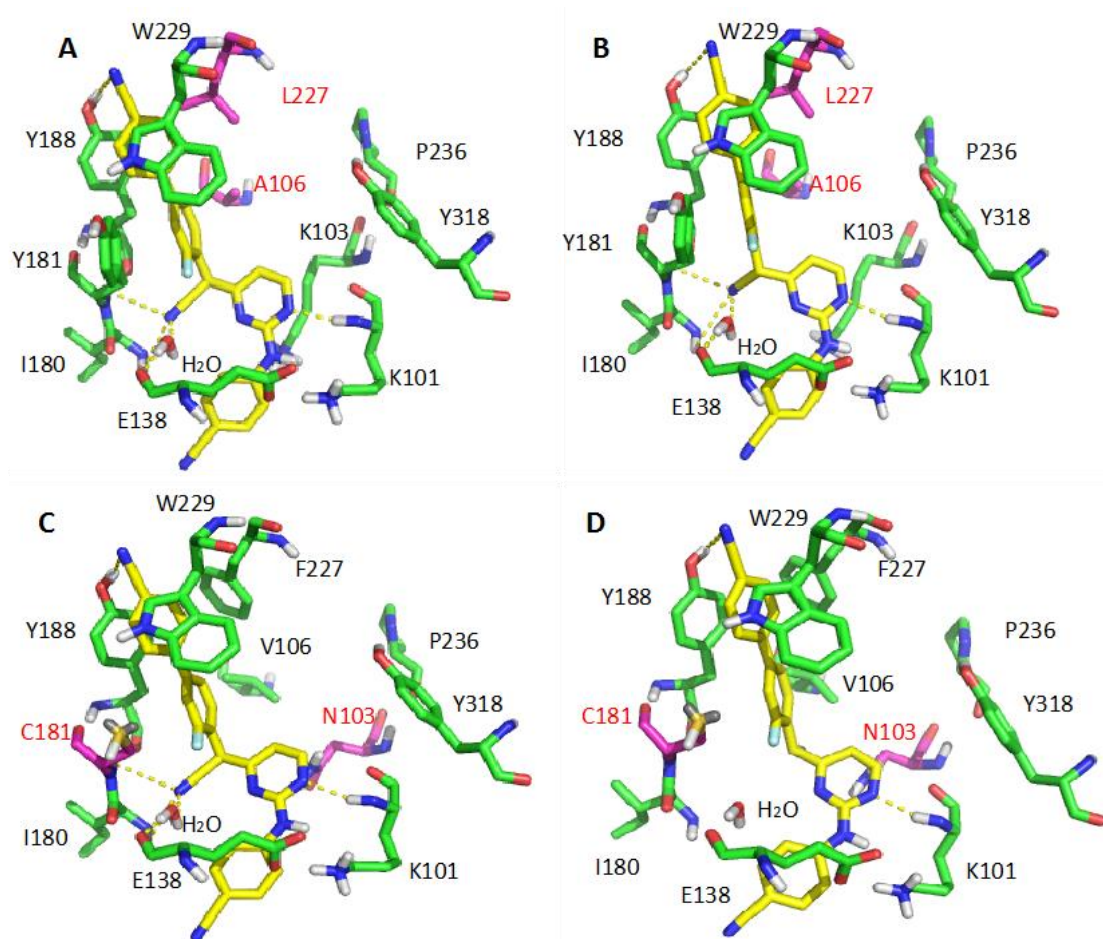

Figure S1 Predicted binding modes of **10p** with double mutant (F227L + V106A, K103N + Y181C) RT (PDB: 2ZD1). (A) F227L + V106A mutant RT with **10p-S**; (B) F227L + V106A mutant RT with **10p-R**; (C) K103N + Y181C mutant RT with **10p-S**; (D) K103N + Y181C mutant RT with **10p-R**.

# $^1\text{H}$ -NMR, $^{13}\text{C}$ -NMR and MS spectra of compounds

## 1. Spectra of compound 10a

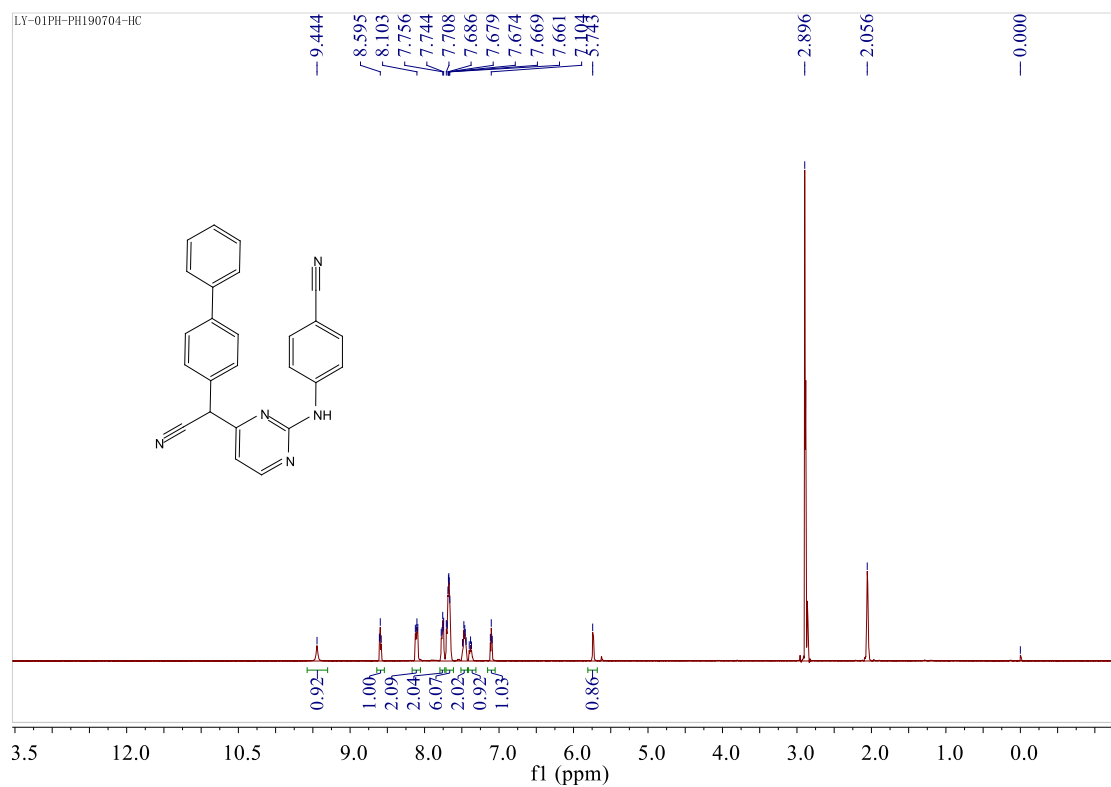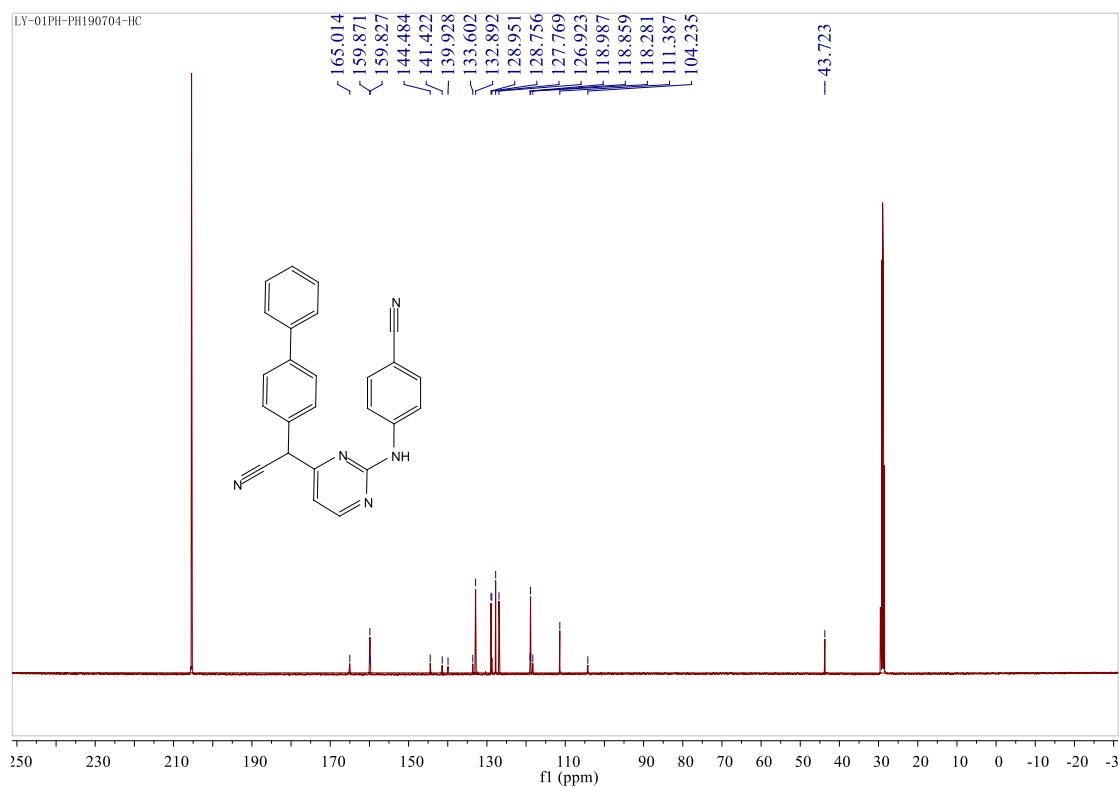

# Display Report

## Analysis Info

Analysis Name D:\Data\data\2019\H-H\_BB1\_01\_3080.d  
Method MS-Pos-10min.m  
Sample Name H-H  
Comment

Acquisition Date 1/7/2020 15:15:57 PM

Operator BDAL@DE  
Instrument compact 8255754.20127

## Acquisition Parameter

|             |          |                      |          |                  |           |
|-------------|----------|----------------------|----------|------------------|-----------|
| Source Type | ESI      | Ion Polarity         | Positive | Set Nebulizer    | 2.0 Bar   |
| Focus       | Active   | Set Capillary        | 5000 V   | Set Dry Heater   | 200 °C    |
| Scan Begin  | 50 m/z   | Set End Plate Offset | -500 V   | Set Dry Gas      | 8.0 l/min |
| Scan End    | 1500 m/z | Set Charging Voltage | 2000 V   | Set Divert Valve | Waste     |
|             |          | Set Corona           | 0 nA     | Set APCI Heater  | 0 °C      |

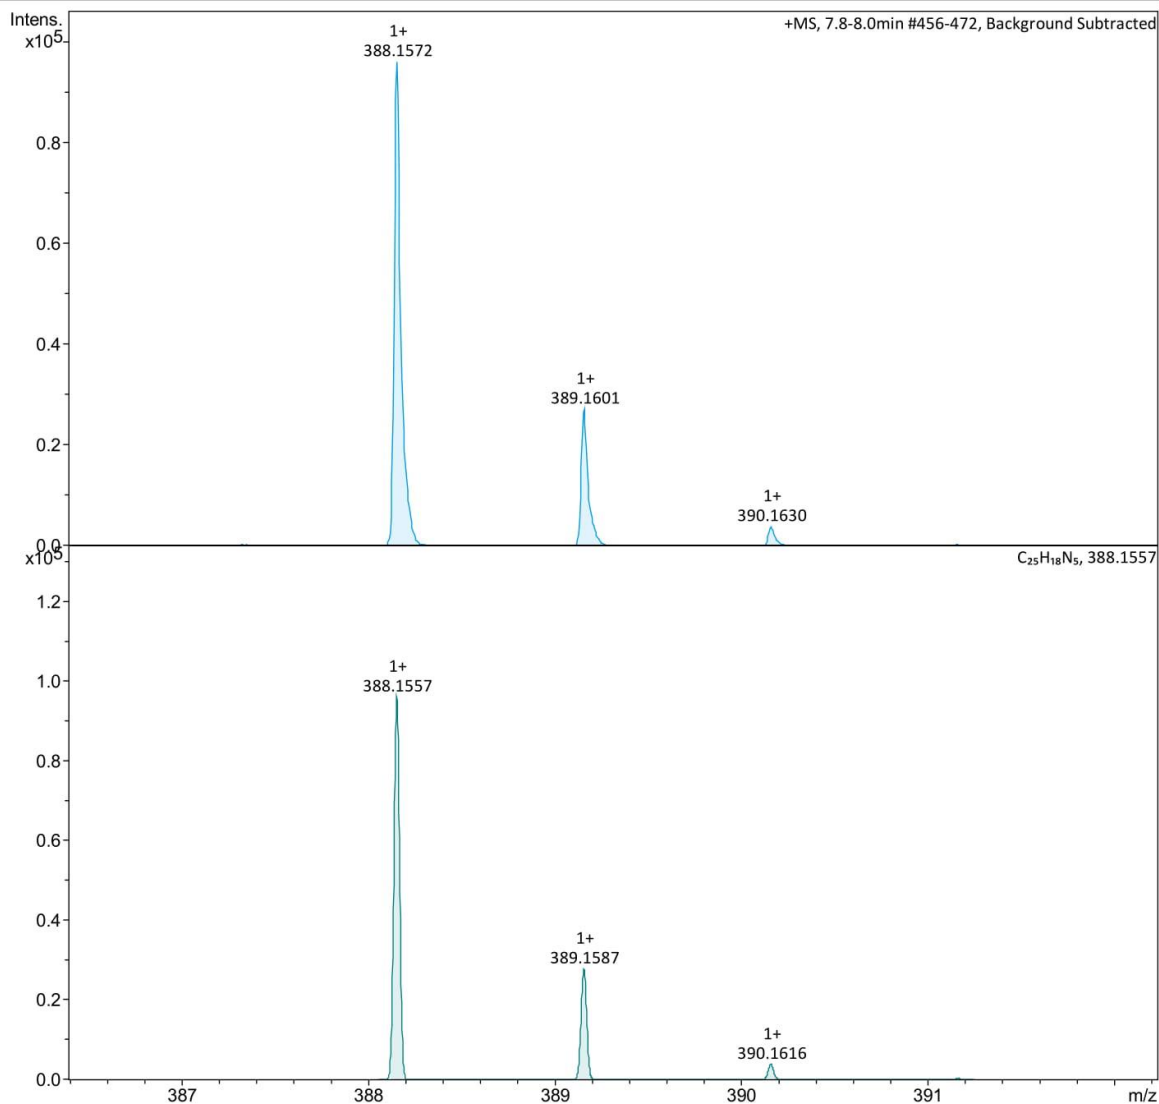

H-H\_BB1\_01\_3080.d

Bruker Compass DataAnalysis 4.3

printed: 1/7/2020 16:13:25 PM

by: BDAL@DE

Page 1 of 1

## 2. Spectra of compound 10b

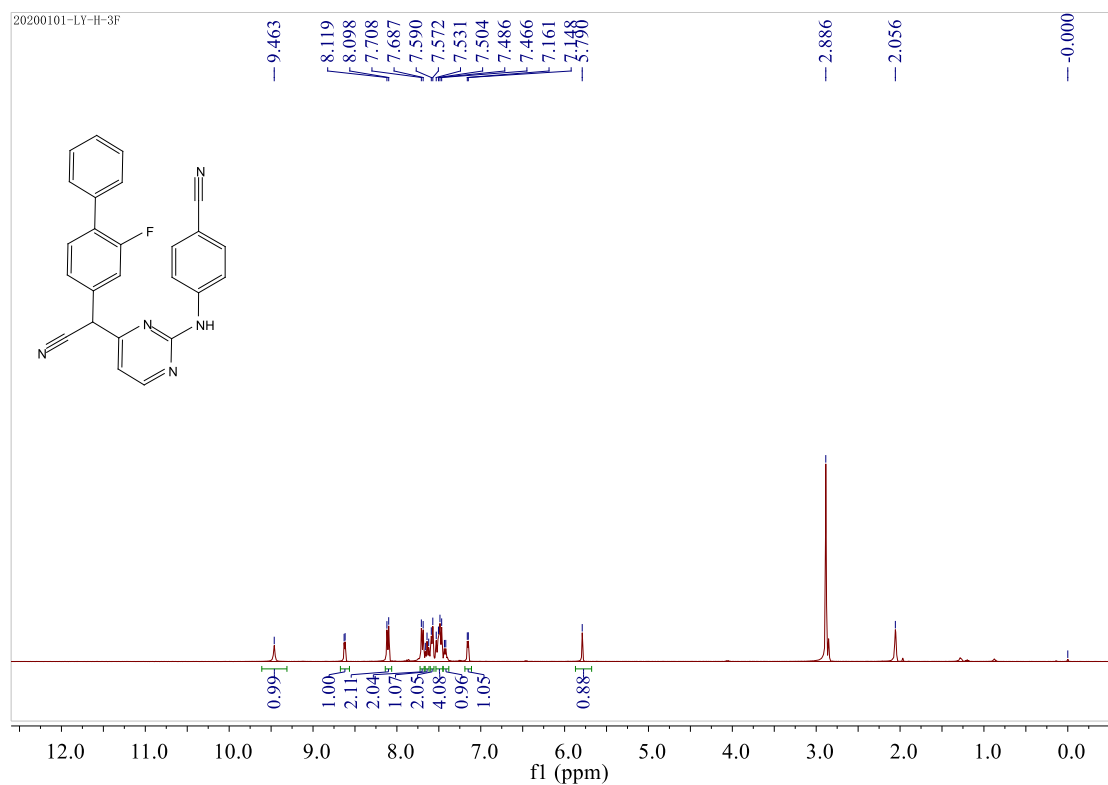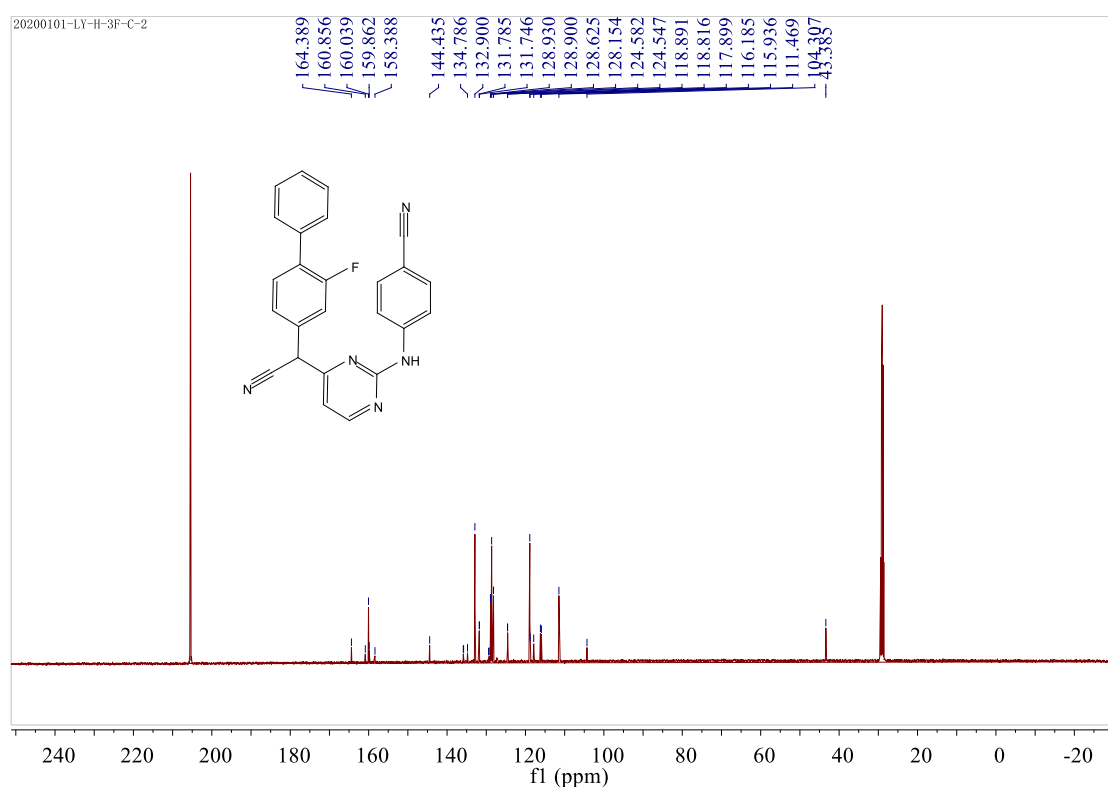

## Display Report

### Analysis Info

Analysis Name D:\Data\data\2019\H-3F\_BD5\_01\_2929.d  
Method MS-2MIN-NEG.m  
Sample Name H-3F  
Comment

Acquisition Date 12/24/2019 11:08:34 AM  
Operator BDAL@DE  
Instrument compact 8255754.20127

### Acquisition Parameter

|             |          |                      |          |                  |           |
|-------------|----------|----------------------|----------|------------------|-----------|
| Source Type | ESI      | Ion Polarity         | Negative | Set Nebulizer    | 2.0 Bar   |
| Focus       | Active   | Set Capillary        | 2800 V   | Set Dry Heater   | 200 °C    |
| Scan Begin  | 50 m/z   | Set End Plate Offset | -500 V   | Set Dry Gas      | 8.0 l/min |
| Scan End    | 1500 m/z | Set Charging Voltage | 2000 V   | Set Divert Valve | Waste     |
|             |          | Set Corona           | 0 nA     | Set APCI Heater  | 0 °C      |

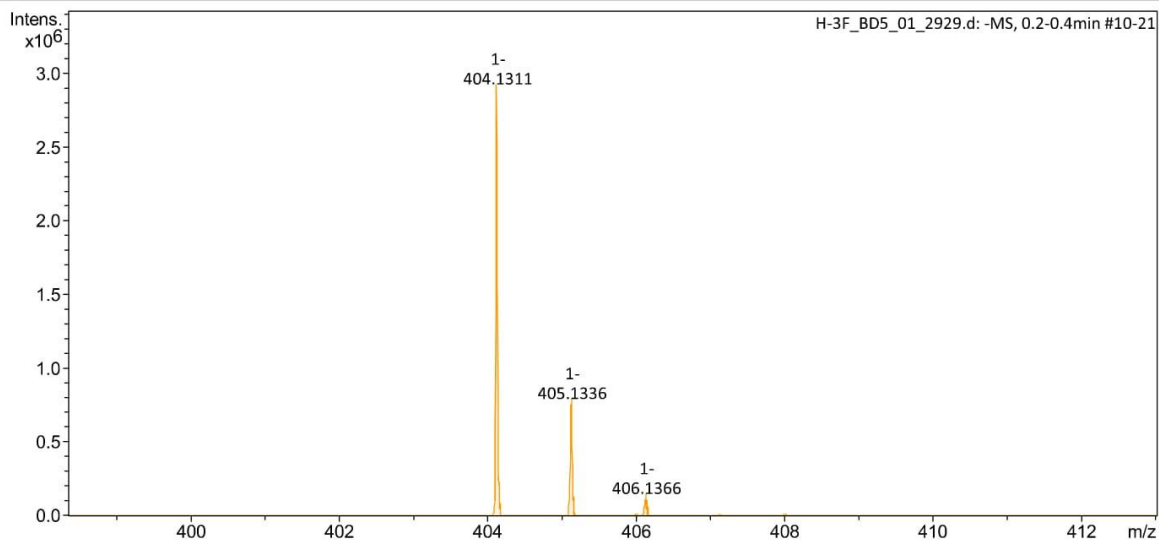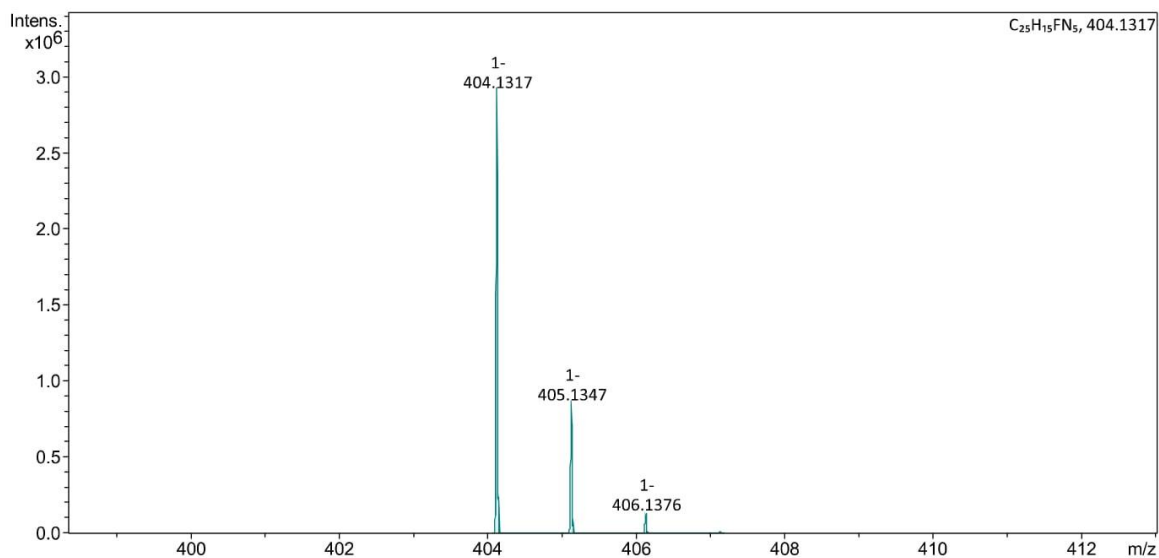

H-3F\_BD5\_01\_2929.d

Bruker Compass DataAnalysis 4.3

printed: 12/24/2019 11:25:45 AM

by: BDAL@DE

Page 1 of 1

### 3. Spectra of compound 10c

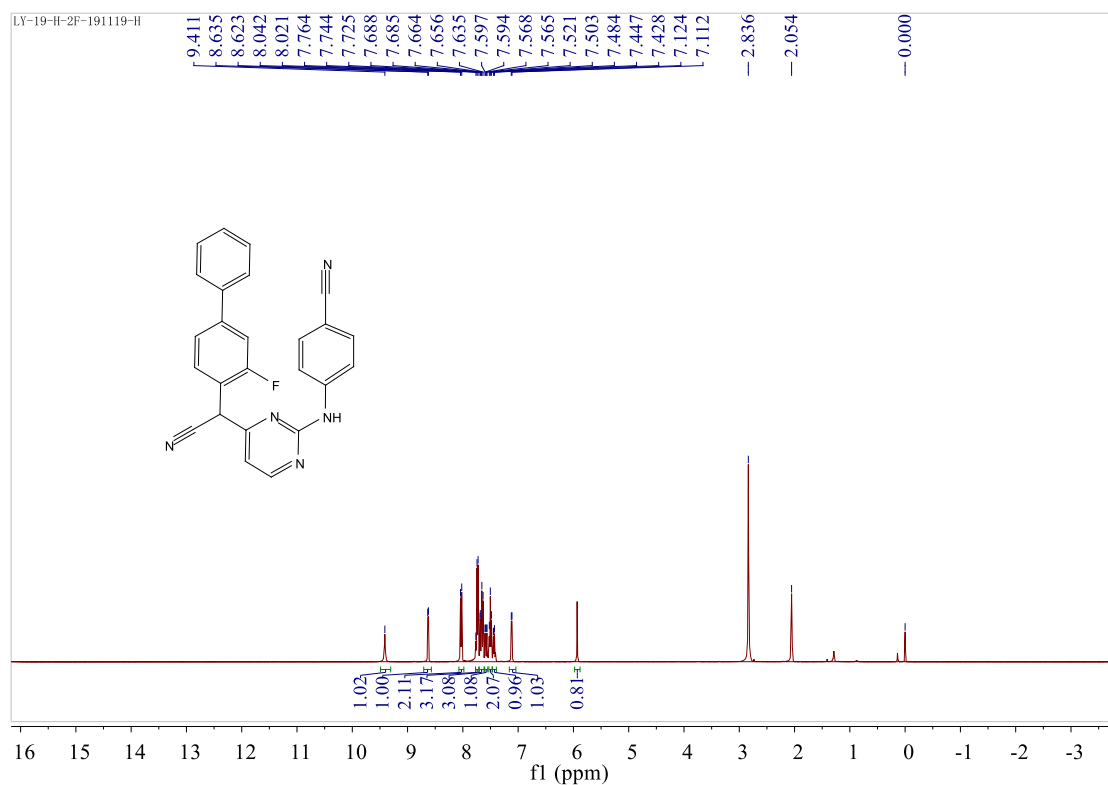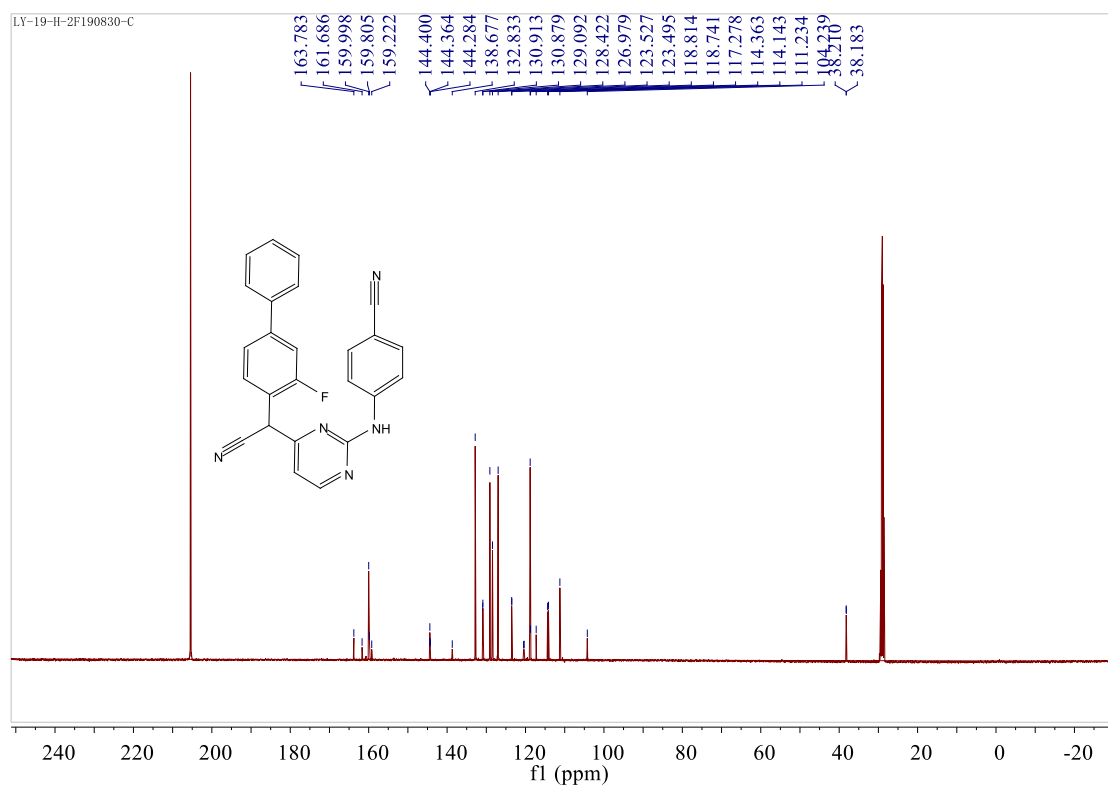

## Display Report

### Analysis Info

Analysis Name D:\Data\data\2019\H-2F\_BD6\_01\_2930.d  
Method MS-2MIN-NEG.m  
Sample Name H-2F  
Comment

Acquisition Date 12/24/2019 11:11:19 AM  
Operator BDAL@DE  
Instrument compact 8255754.20127

### Acquisition Parameter

|             |          |                      |          |                  |           |
|-------------|----------|----------------------|----------|------------------|-----------|
| Source Type | ESI      | Ion Polarity         | Negative | Set Nebulizer    | 2.0 Bar   |
| Focus       | Active   | Set Capillary        | 2800 V   | Set Dry Heater   | 200 °C    |
| Scan Begin  | 50 m/z   | Set End Plate Offset | -500 V   | Set Dry Gas      | 8.0 l/min |
| Scan End    | 1500 m/z | Set Charging Voltage | 2000 V   | Set Divert Valve | Waste     |
|             |          | Set Corona           | 0 nA     | Set APCI Heater  | 0 °C      |

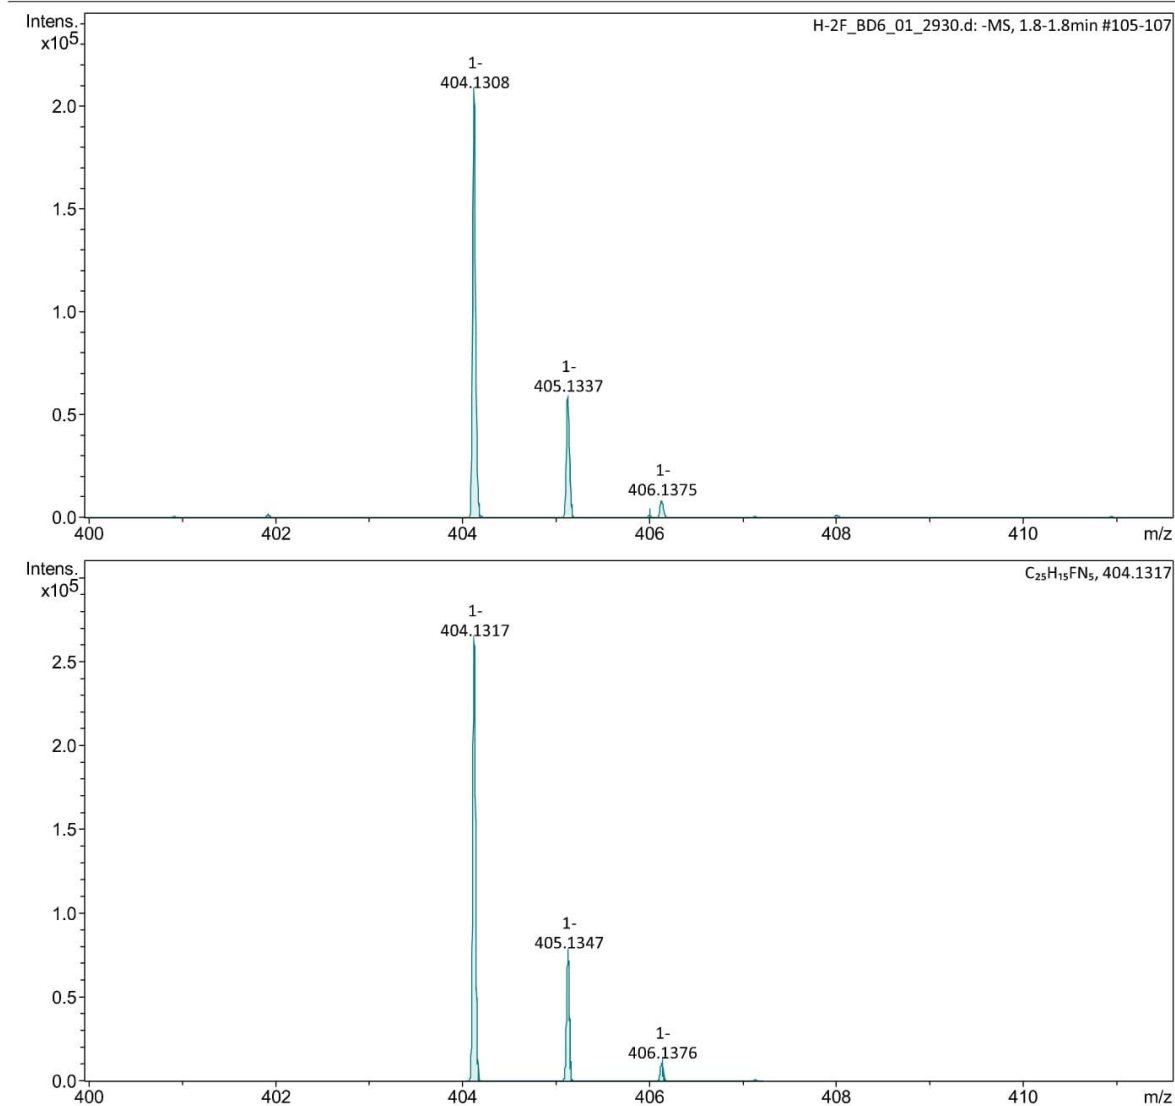

H-2F\_BD6\_01\_2930.d

Bruker Compass DataAnalysis 4.3

printed: 12/24/2019 11:28:17 AM

by: BDAL@DE

Page 1 of 1

#### 4. Spectra of compound 10d

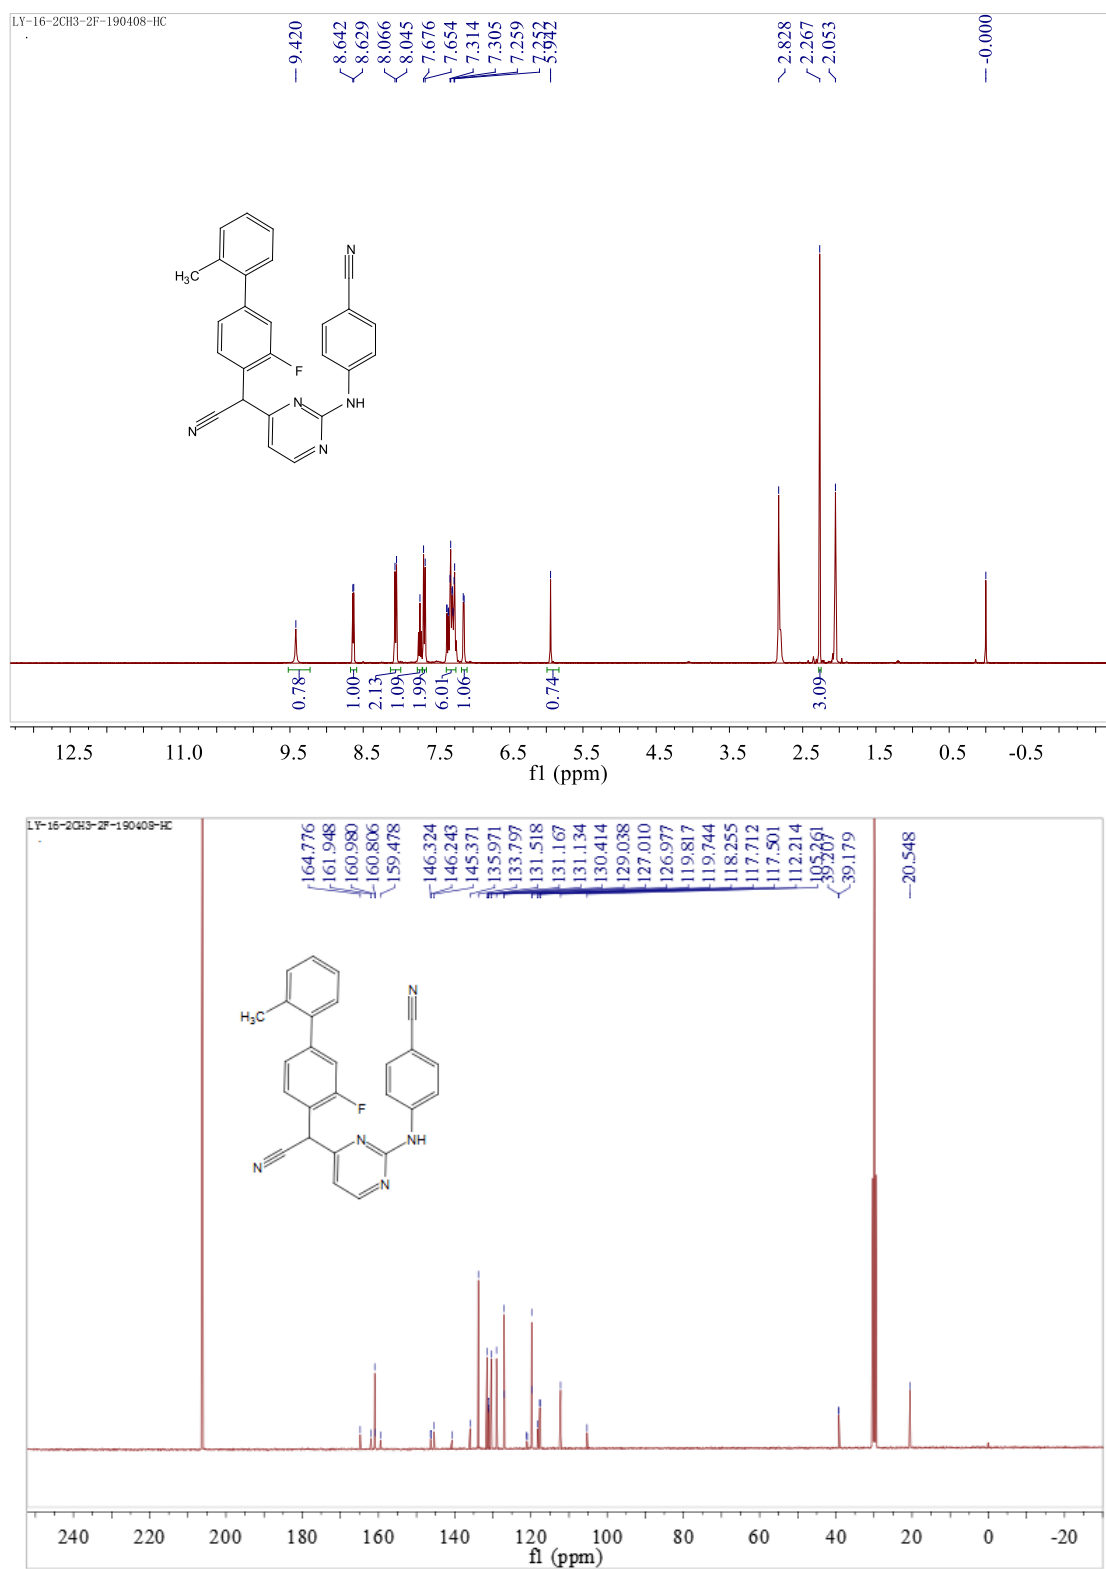



## Display Report

### Analysis Info

Analysis Name D:\Data\data\2019\2CH3-2F\_BD1\_01\_2925.d  
Method MS-2MIN-NEG.m  
Sample Name 2CH3-2F  
Comment

Acquisition Date 12/24/2019 10:57:31 AM  
Operator BDAL@DE  
Instrument compact 8255754.20127

### Acquisition Parameter

|             |          |                      |          |                  |           |
|-------------|----------|----------------------|----------|------------------|-----------|
| Source Type | ESI      | Ion Polarity         | Negative | Set Nebulizer    | 2.0 Bar   |
| Focus       | Active   | Set Capillary        | 2800 V   | Set Dry Heater   | 200 °C    |
| Scan Begin  | 50 m/z   | Set End Plate Offset | -500 V   | Set Dry Gas      | 8.0 l/min |
| Scan End    | 1500 m/z | Set Charging Voltage | 2000 V   | Set Divert Valve | Waste     |
|             |          | Set Corona           | 0 nA     | Set APCI Heater  | 0 °C      |

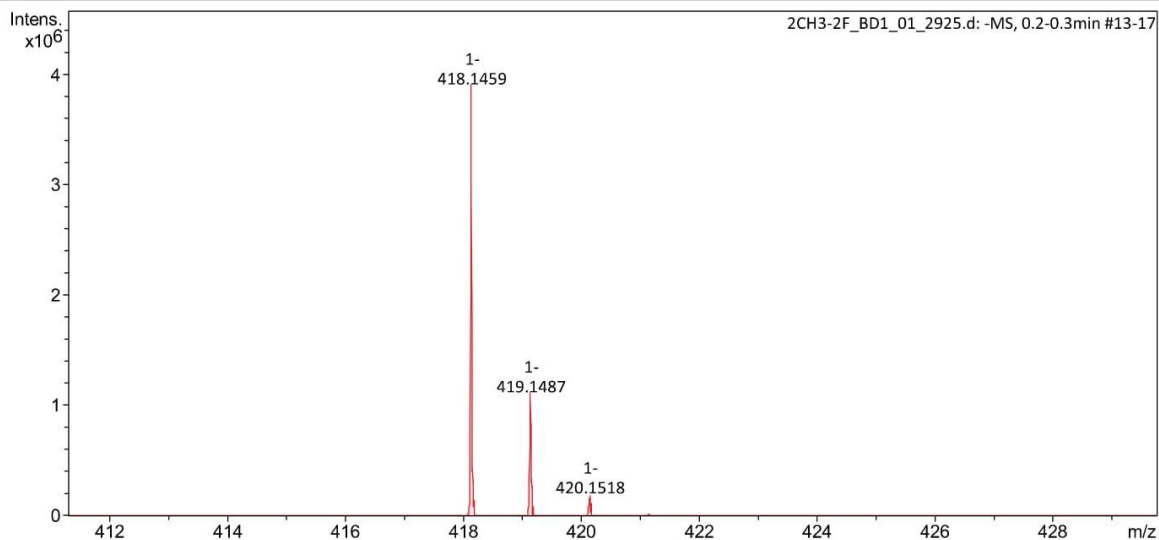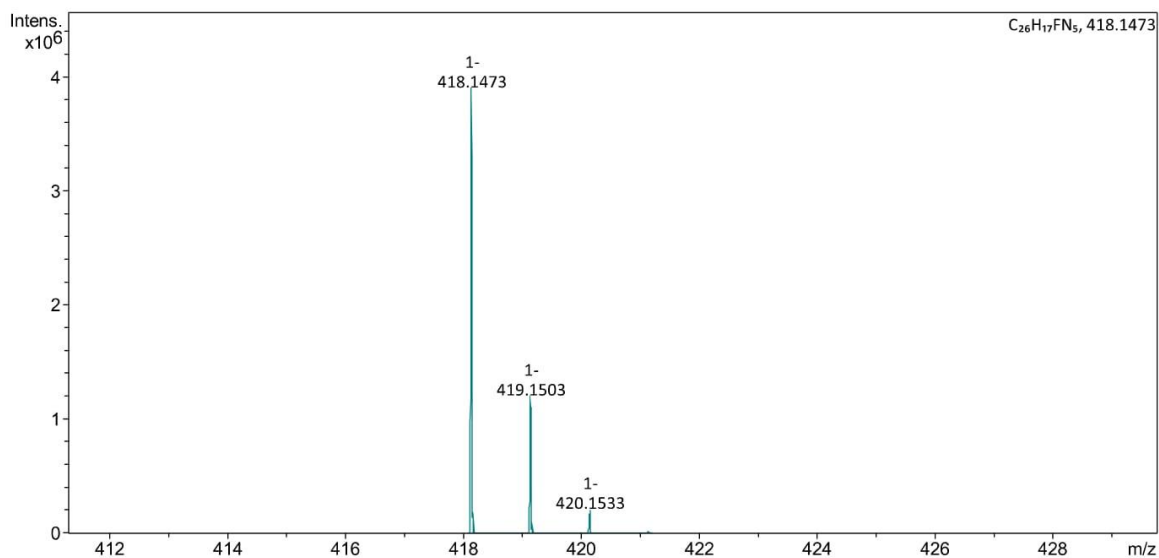

2CH3-2F\_BD1\_01\_2925.d

Bruker Compass DataAnalysis 4.3

printed: 12/24/2019 11:18:13 AM

by: BDAL@DE

Page 1 of 1

## 5. Spectra of compound 10e

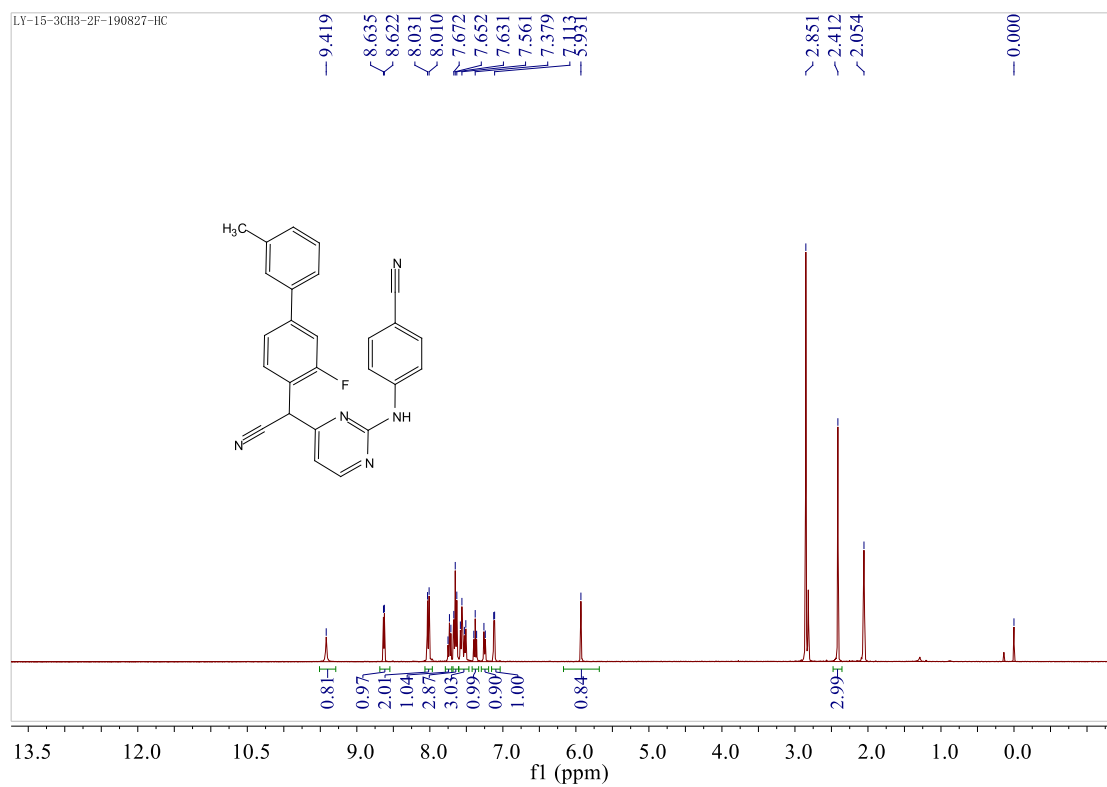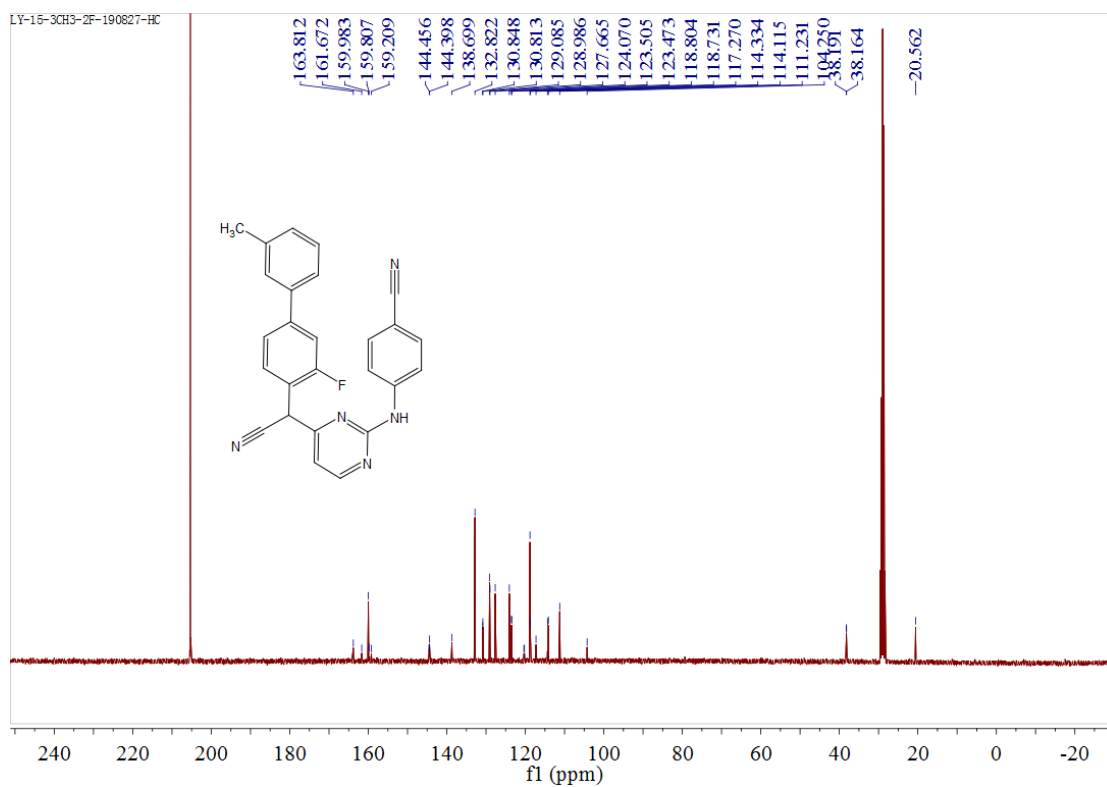

## Display Report

### Analysis Info

Analysis Name D:\Data\data\2019\3CH32F\_RC2\_01\_2873.d  
Method MS-2MIN-NEG.m  
Sample Name 3CH32F  
Comment

Acquisition Date 12/18/2019 17:39:00 PM  
Operator BDAL@DE  
Instrument compact 8255754.20127

### Acquisition Parameter

|             |          |                      |          |                  |           |
|-------------|----------|----------------------|----------|------------------|-----------|
| Source Type | ESI      | Ion Polarity         | Negative | Set Nebulizer    | 2.0 Bar   |
| Focus       | Active   | Set Capillary        | 2800 V   | Set Dry Heater   | 200 °C    |
| Scan Begin  | 50 m/z   | Set End Plate Offset | -500 V   | Set Dry Gas      | 8.0 l/min |
| Scan End    | 1500 m/z | Set Charging Voltage | 2000 V   | Set Divert Valve | Waste     |
|             |          | Set Corona           | 0 nA     | Set APCI Heater  | 0 °C      |

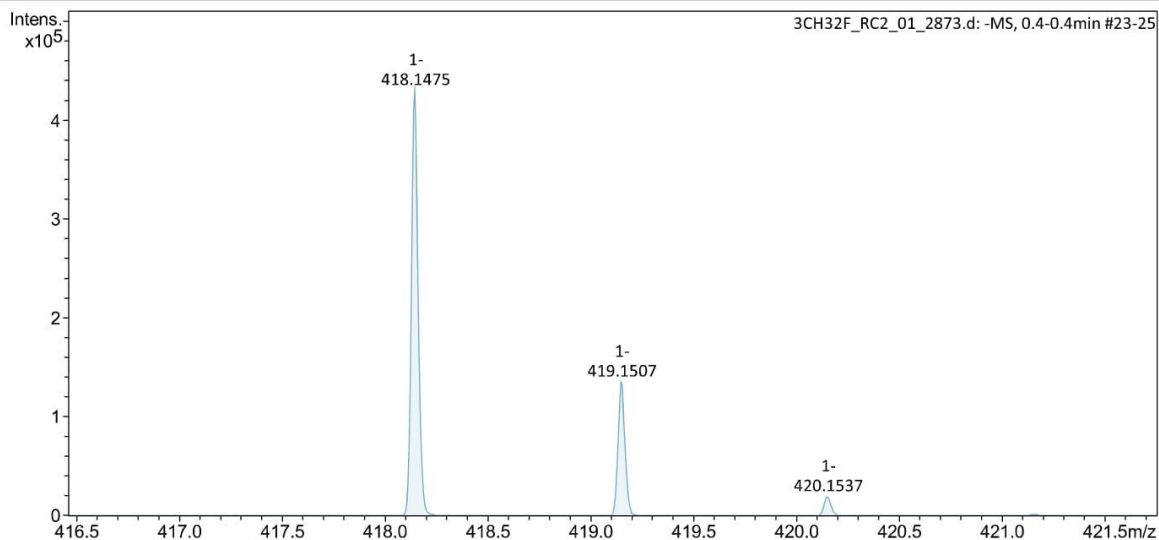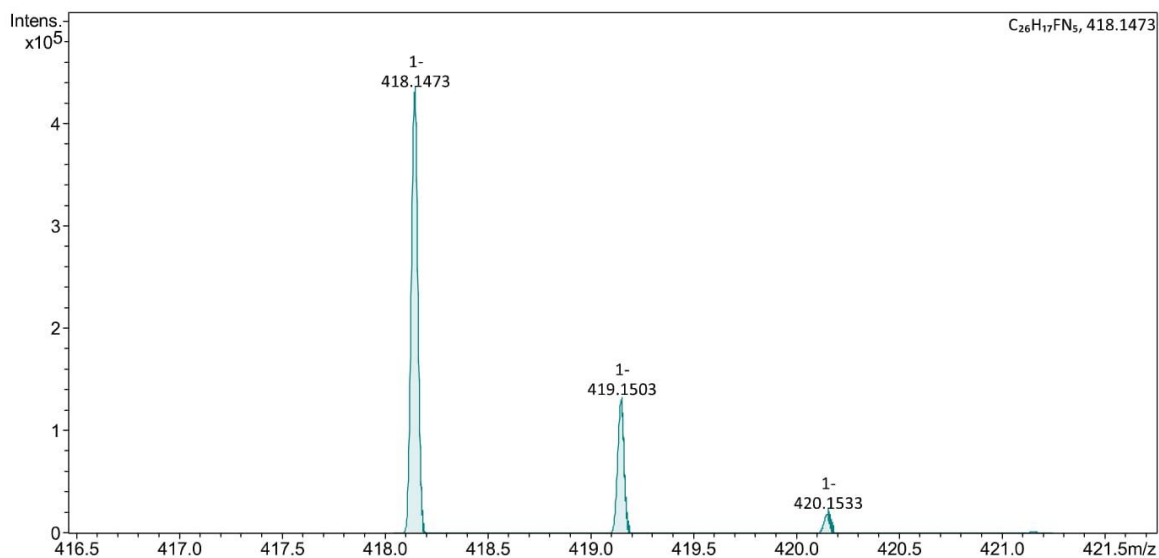

3CH32F\_RC2\_01\_2873.d

Bruker Compass DataAnalysis 4.3

printed: 12/19/2019 13:41:53 PM

by: BDAL@DE

Page 1 of 1

## 6. Spectra of compound 10 f

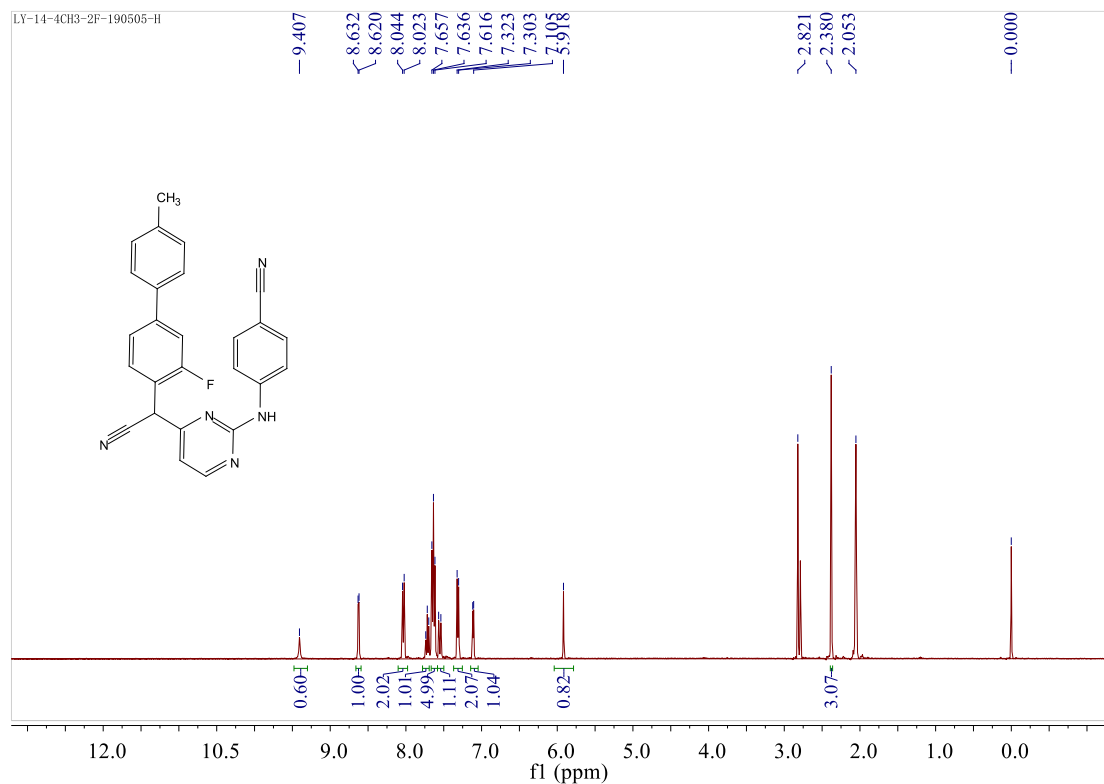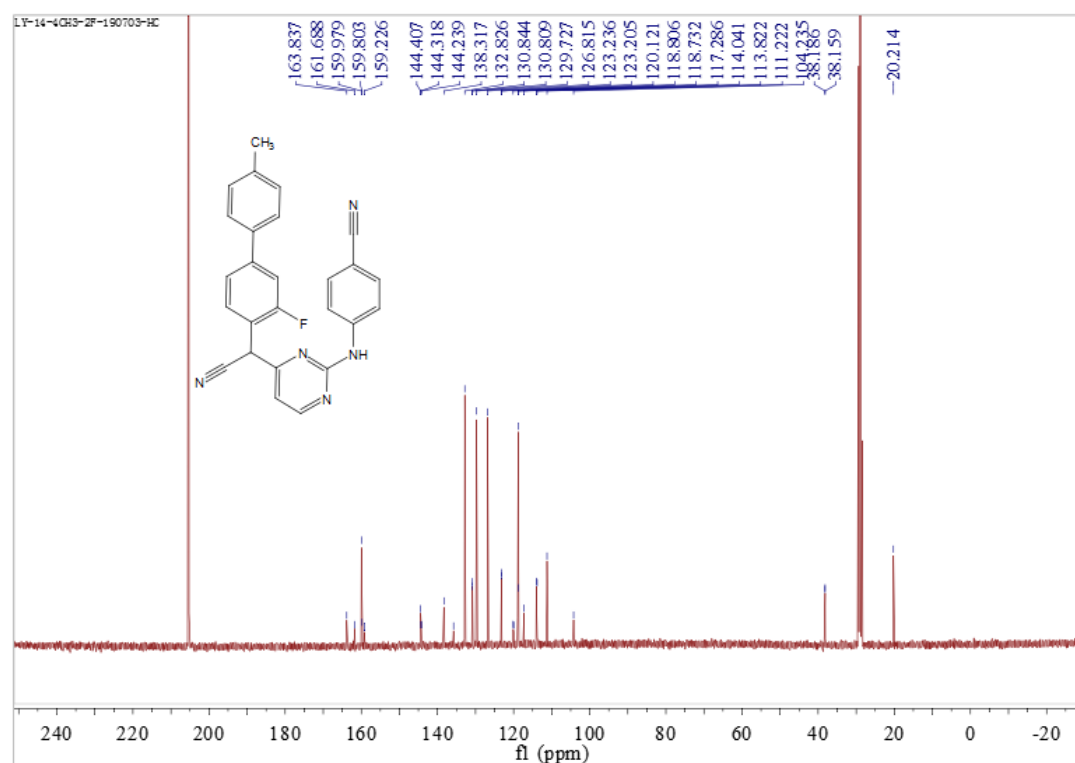

## Display Report

### Analysis Info

Analysis Name D:\Data\data\2019\4CH3-2F\_RD3\_01\_2864.d  
Method MS-2MIN-NEG.m  
Sample Name 4CH3-2F  
Comment

Acquisition Date 12/18/2019 17:14:09 PM  
Operator BDAL@DE  
Instrument compact 8255754.20127

### Acquisition Parameter

|             |          |                      |          |                  |           |
|-------------|----------|----------------------|----------|------------------|-----------|
| Source Type | ESI      | Ion Polarity         | Negative | Set Nebulizer    | 2.0 Bar   |
| Focus       | Active   | Set Capillary        | 2800 V   | Set Dry Heater   | 200 °C    |
| Scan Begin  | 50 m/z   | Set End Plate Offset | -500 V   | Set Dry Gas      | 8.0 l/min |
| Scan End    | 1500 m/z | Set Charging Voltage | 2000 V   | Set Divert Valve | Waste     |
|             |          | Set Corona           | 0 nA     | Set APCI Heater  | 0 °C      |

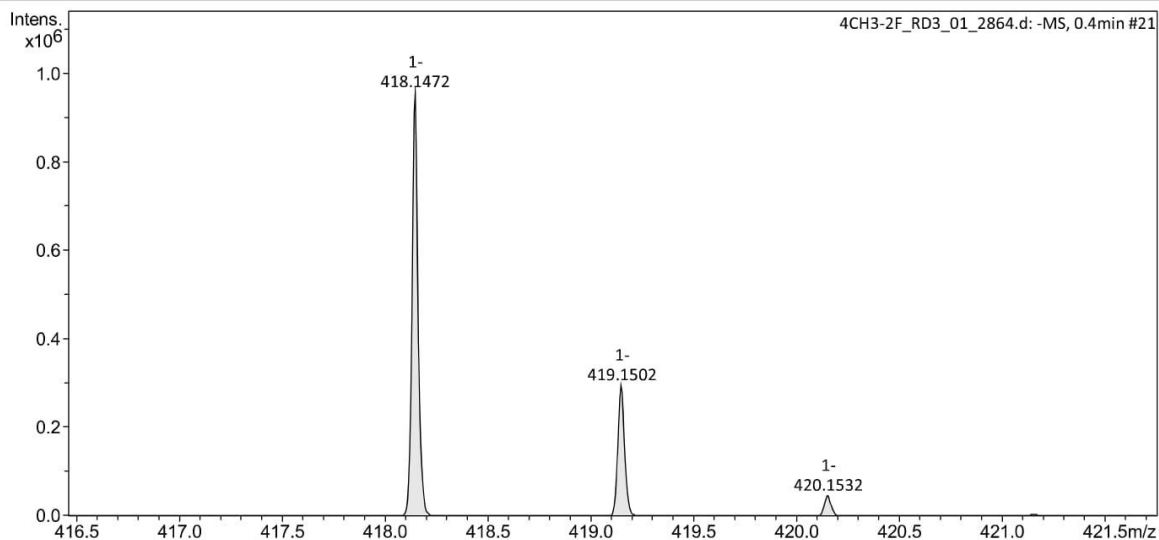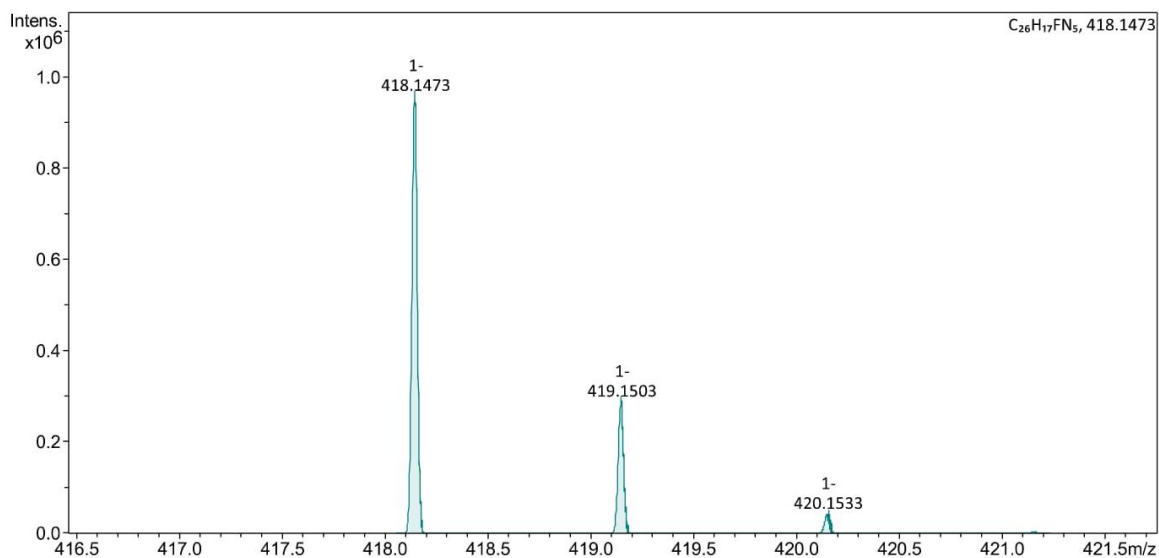

4CH3-2F\_RD3\_01\_2864.d

Bruker Compass DataAnalysis 4.3

printed: 12/19/2019 13:39:46 PM

by: BDAL@DE

Page 1 of 1

## 7. Spectra of compound 10g

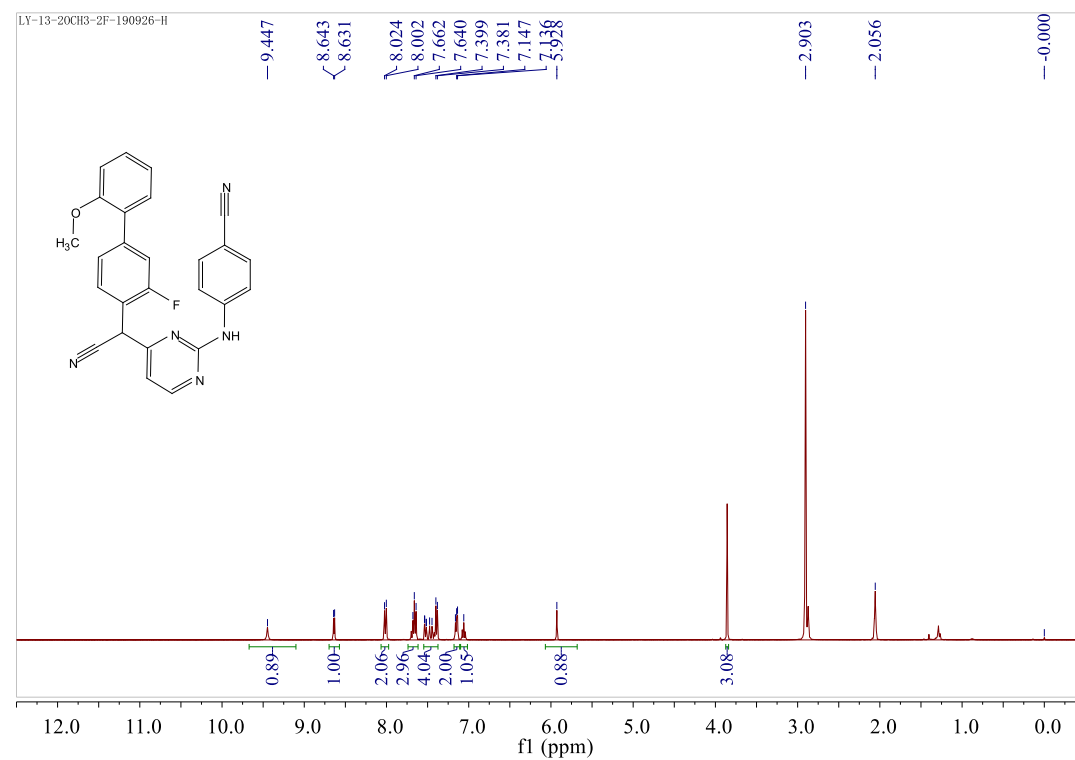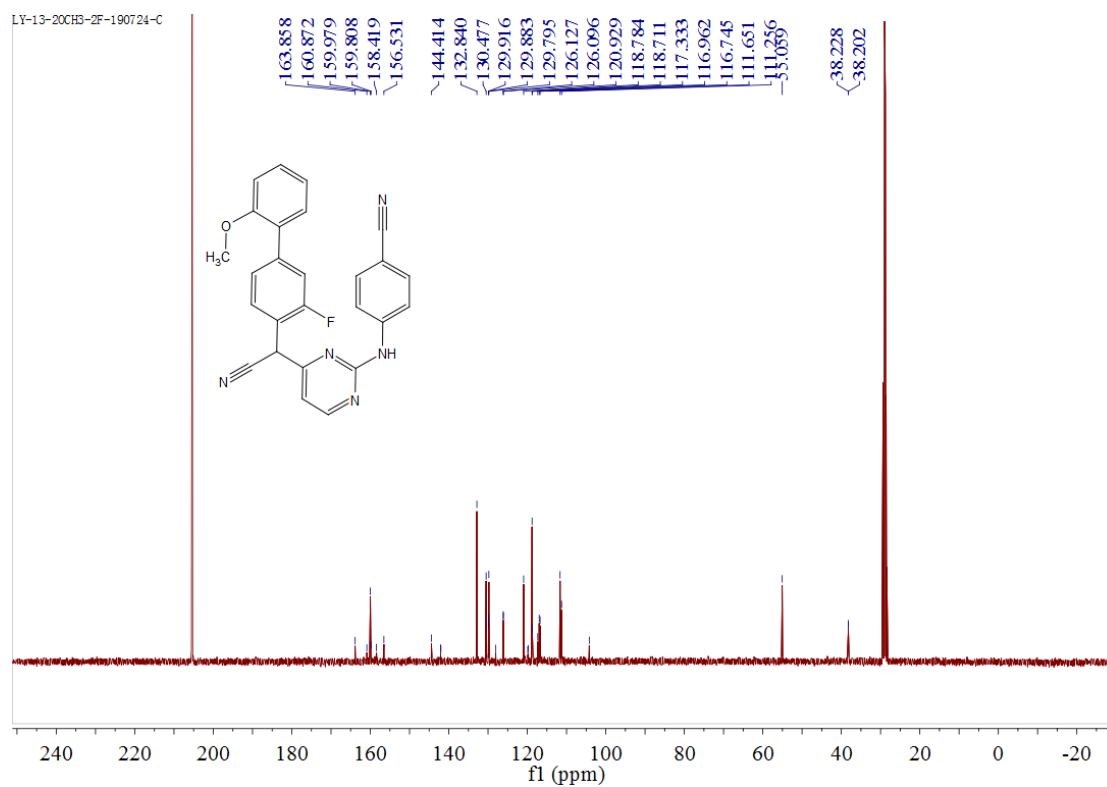

## Display Report

### Analysis Info

Analysis Name D:\Data\data\2019\2OCH3-2F\_RC1\_01\_2874.d  
Method MS-2MIN-NEG.m  
Sample Name 2OCH3-2F  
Comment

Acquisition Date 12/18/2019 17:41:46 PM  
Operator BDAL@DE  
Instrument compact 8255754.20127

### Acquisition Parameter

|             |          |                      |          |                  |           |
|-------------|----------|----------------------|----------|------------------|-----------|
| Source Type | ESI      | Ion Polarity         | Negative | Set Nebulizer    | 2.0 Bar   |
| Focus       | Active   | Set Capillary        | 2800 V   | Set Dry Heater   | 200 °C    |
| Scan Begin  | 50 m/z   | Set End Plate Offset | -500 V   | Set Dry Gas      | 8.0 l/min |
| Scan End    | 1500 m/z | Set Charging Voltage | 2000 V   | Set Divert Valve | Waste     |
|             |          | Set Corona           | 0 nA     | Set APCI Heater  | 0 °C      |

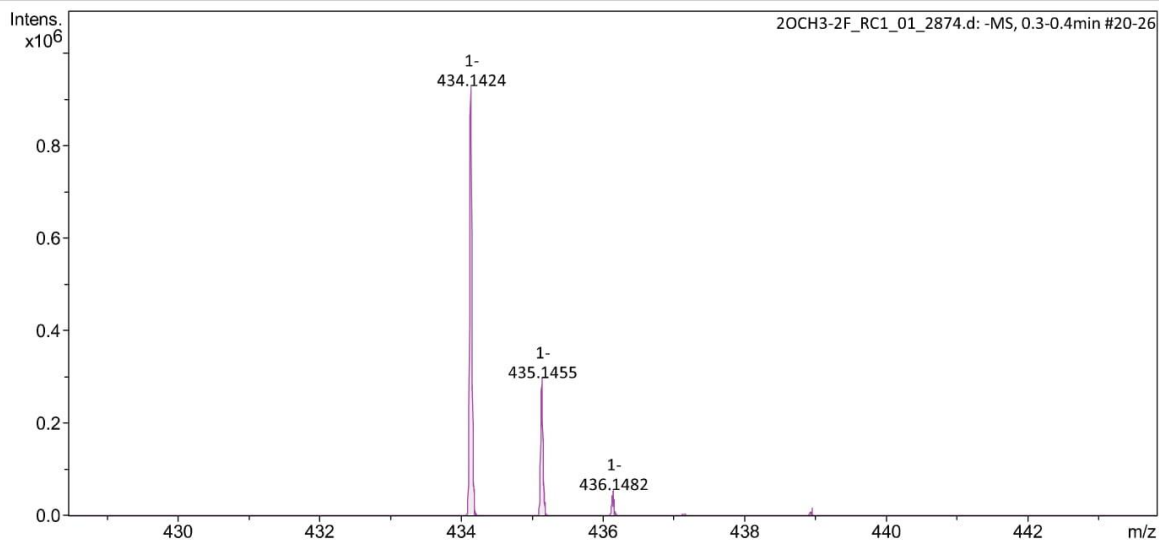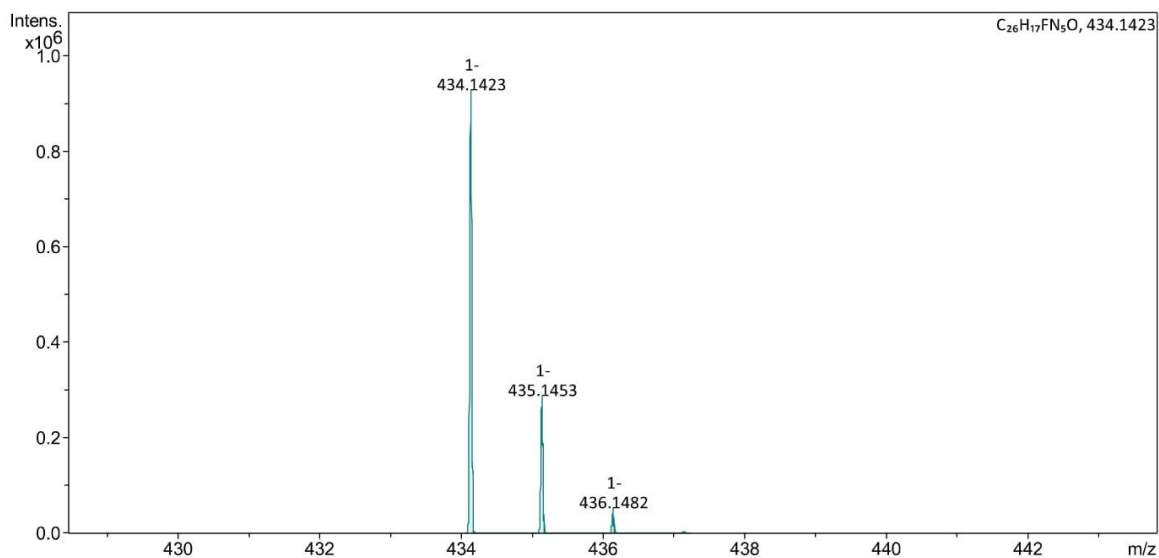

2OCH3-2F\_RC1\_01\_2874.d

Bruker Compass DataAnalysis 4.3

printed: 12/19/2019 12:18:50 PM

by: BDAL@DE

Page 1 of 1

## 8. Spectra of compound 10h

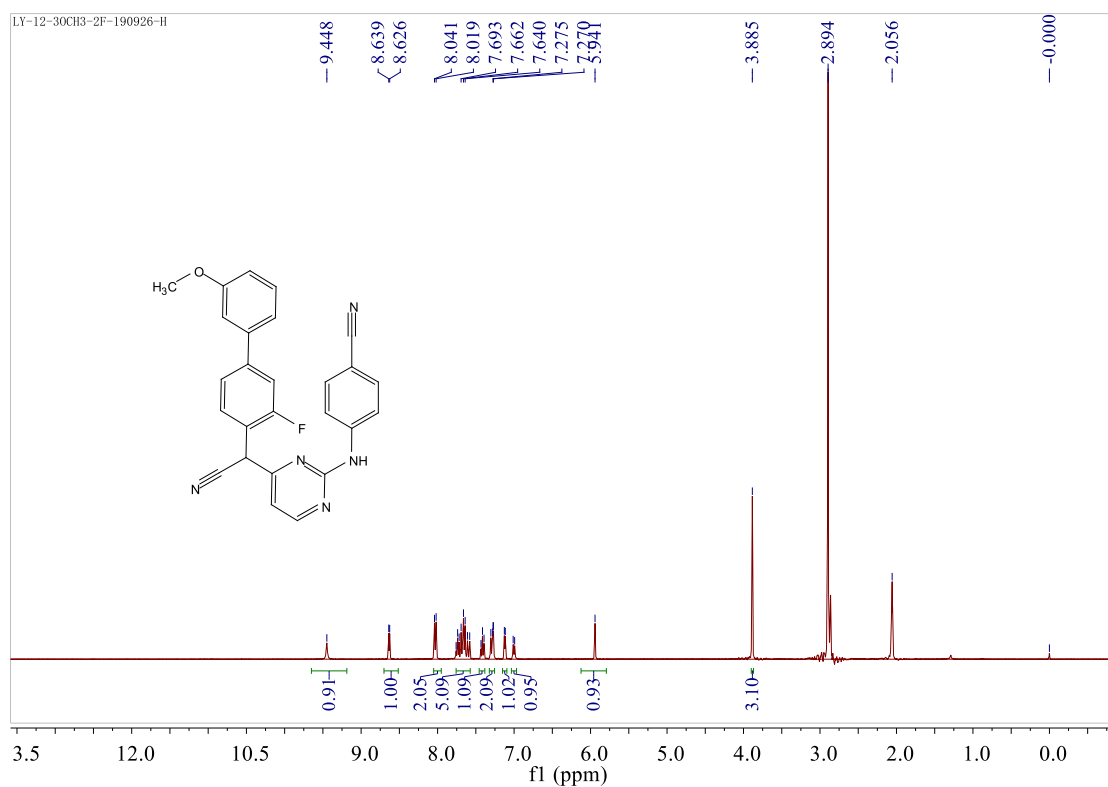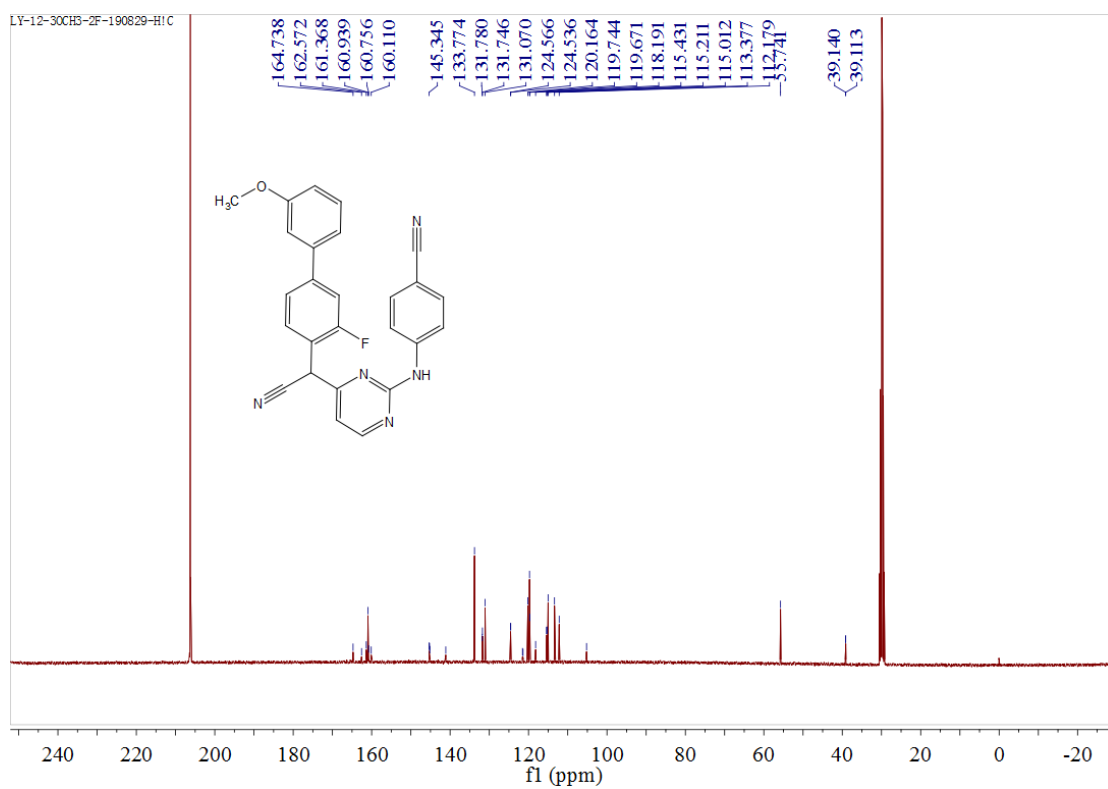



## Display Report

### Analysis Info

Analysis Name D:\Data\data\2019\3OCH3-2F\_RE8\_01\_2851.d  
Method MS-2MIN-NEG.m  
Sample Name 3OCH3-2F  
Comment

Acquisition Date 12/18/2019 16:38:14 PM  
Operator BDAL@DE  
Instrument compact 8255754.20127

### Acquisition Parameter

|             |          |                      |          |                  |           |
|-------------|----------|----------------------|----------|------------------|-----------|
| Source Type | ESI      | Ion Polarity         | Negative | Set Nebulizer    | 2.0 Bar   |
| Focus       | Active   | Set Capillary        | 2800 V   | Set Dry Heater   | 200 °C    |
| Scan Begin  | 50 m/z   | Set End Plate Offset | -500 V   | Set Dry Gas      | 8.0 l/min |
| Scan End    | 1500 m/z | Set Charging Voltage | 2000 V   | Set Divert Valve | Waste     |
|             |          | Set Corona           | 0 nA     | Set APCI Heater  | 0 °C      |

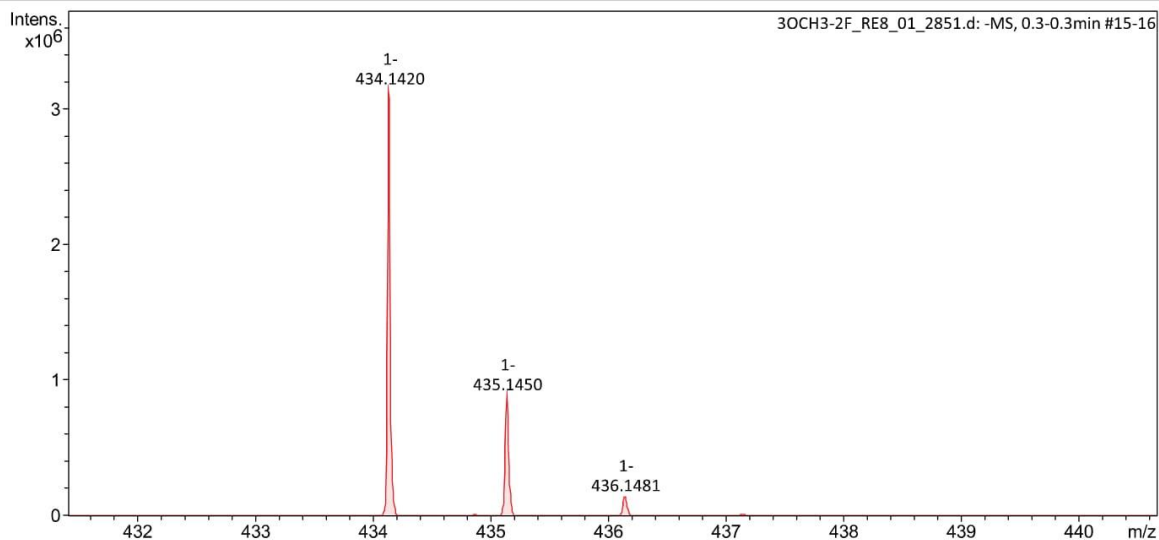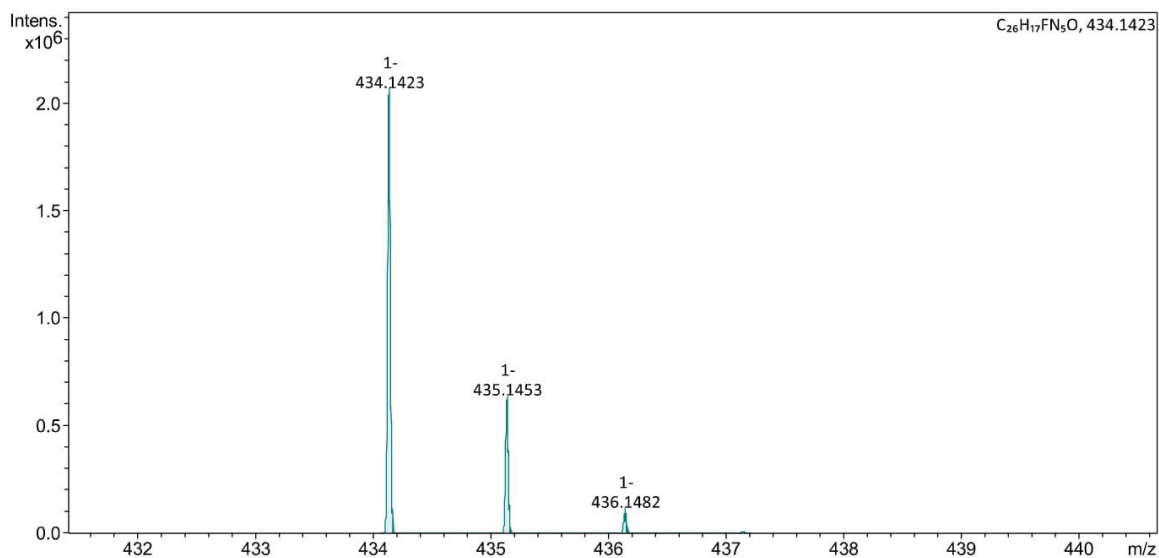

3OCH3-2F\_RE8\_01\_2851.d

Bruker Compass DataAnalysis 4.3

printed: 12/19/2019 12:35:06 PM

by: BDAL@DE

Page 1 of 1

## 9. Spectra of compound 10i

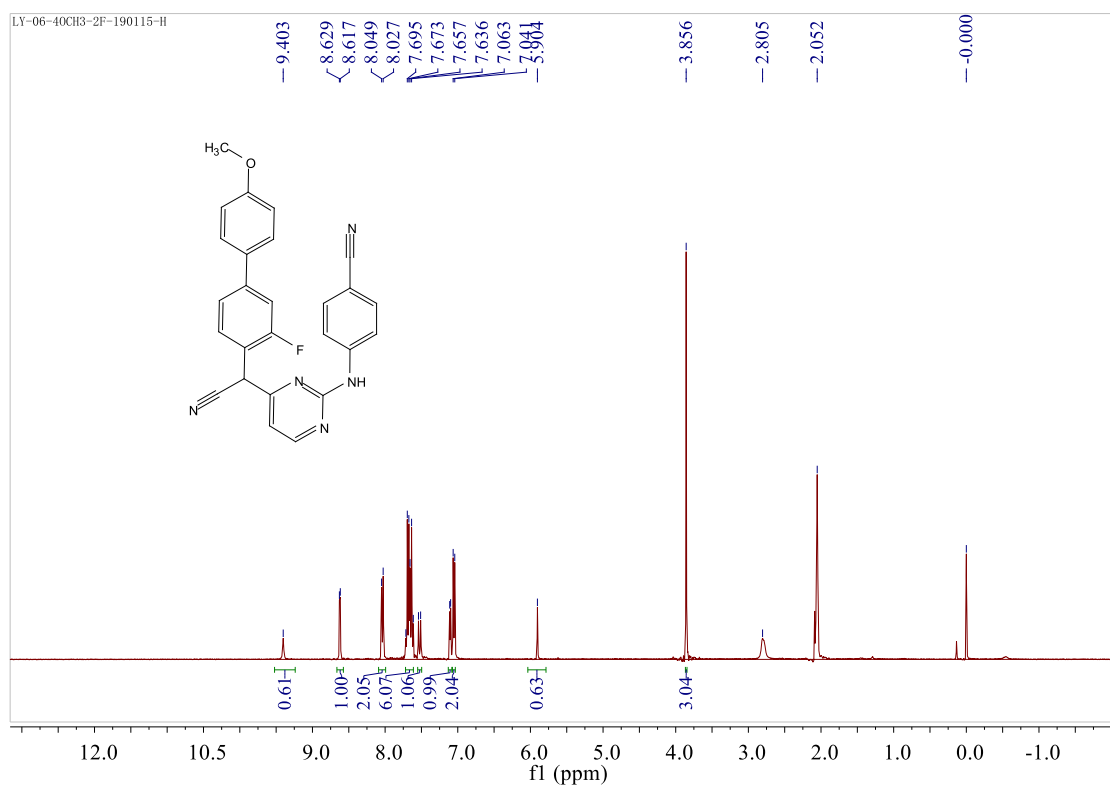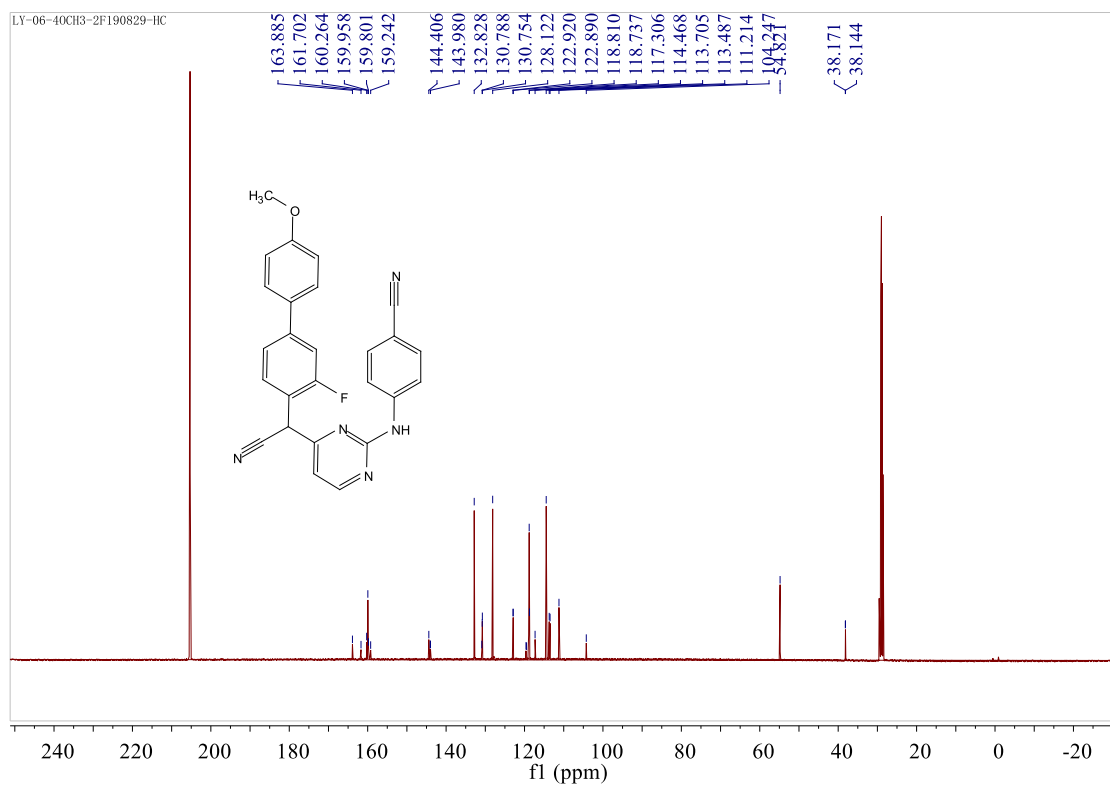

## Display Report

### Analysis Info

Analysis Name D:\Data\data\2019\4OCH3-2F\_GA3\_01\_2903.d  
Method MS-2MIN-NEG.m  
Sample Name 4OCH3-2F  
Comment

Acquisition Date 12/18/2019 19:02:40 PM

Operator BDAL@DE  
Instrument compact 8255754.20127

### Acquisition Parameter

|             |          |                      |          |                  |           |
|-------------|----------|----------------------|----------|------------------|-----------|
| Source Type | ESI      | Ion Polarity         | Negative | Set Nebulizer    | 2.0 Bar   |
| Focus       | Active   | Set Capillary        | 2800 V   | Set Dry Heater   | 200 °C    |
| Scan Begin  | 50 m/z   | Set End Plate Offset | -500 V   | Set Dry Gas      | 8.0 l/min |
| Scan End    | 1500 m/z | Set Charging Voltage | 2000 V   | Set Divert Valve | Waste     |
|             |          | Set Corona           | 0 nA     | Set APCI Heater  | 0 °C      |

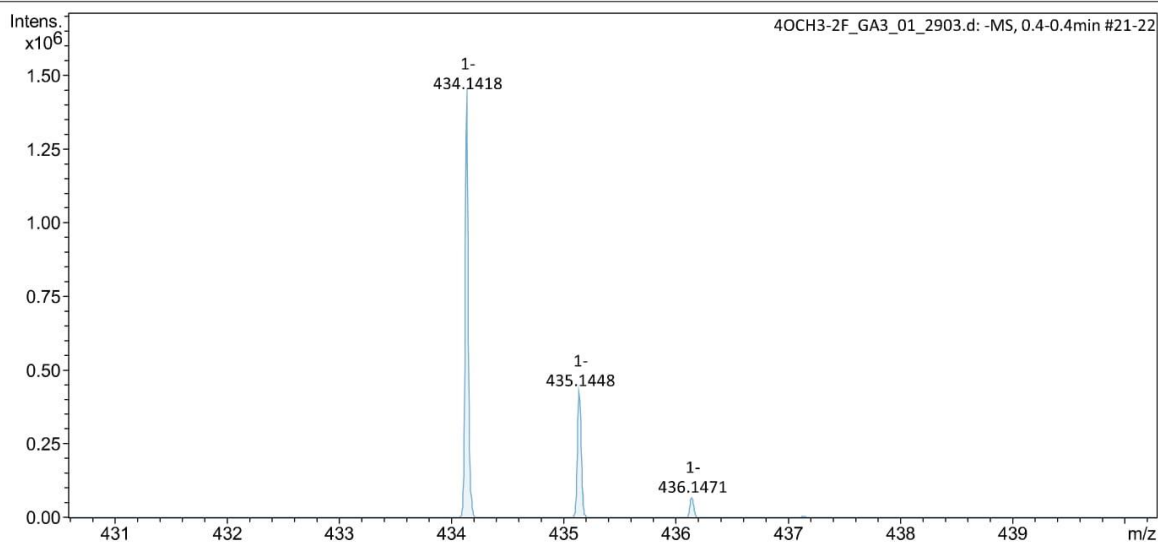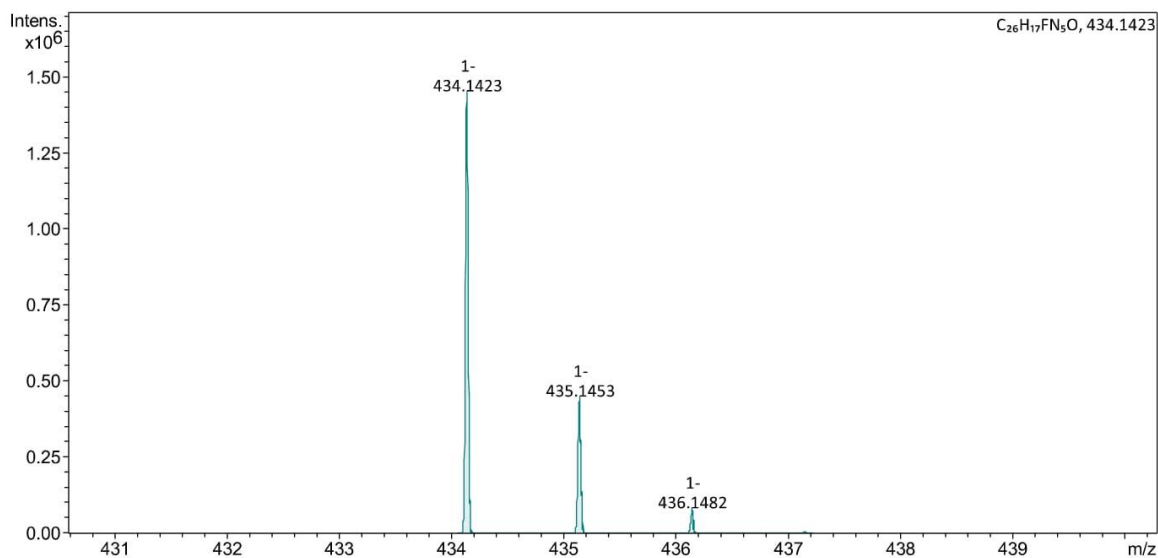

4OCH3-2F\_GA3\_01\_2903.d

Bruker Compass DataAnalysis 4.3

printed: 12/19/2019 11:52:23 AM

by: BDAL@DE

Page 1 of 1

## 10. Spectra of compound 10j

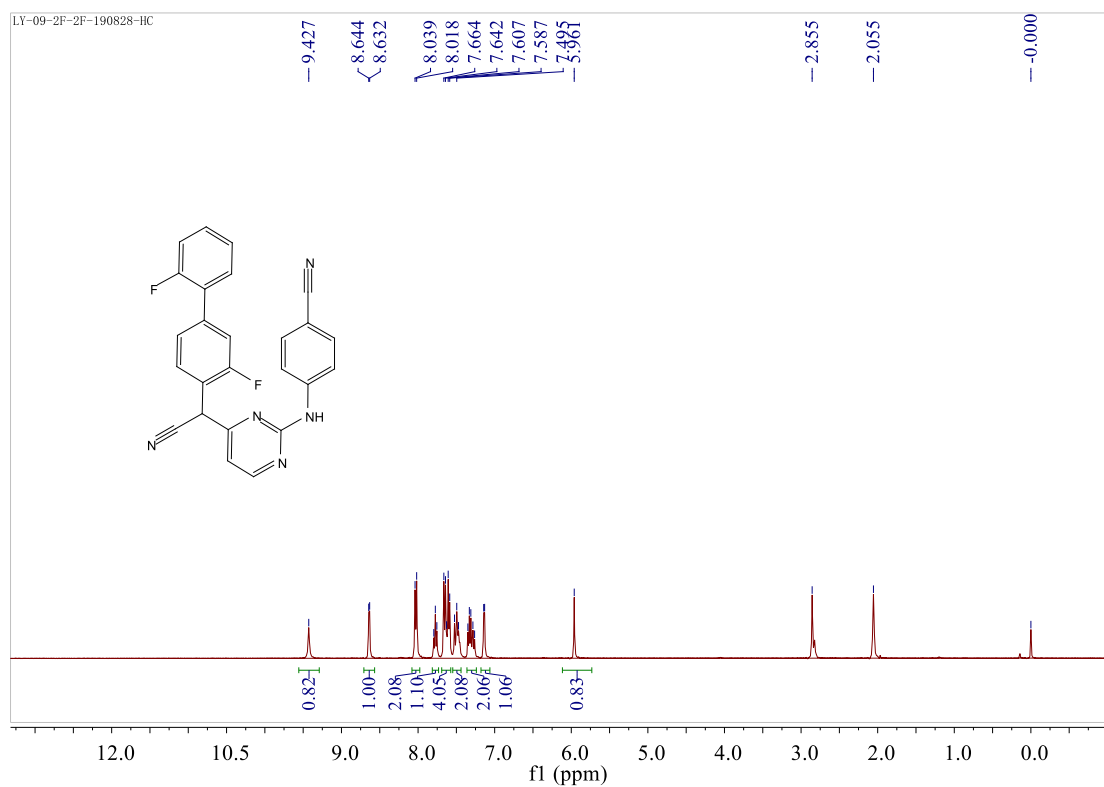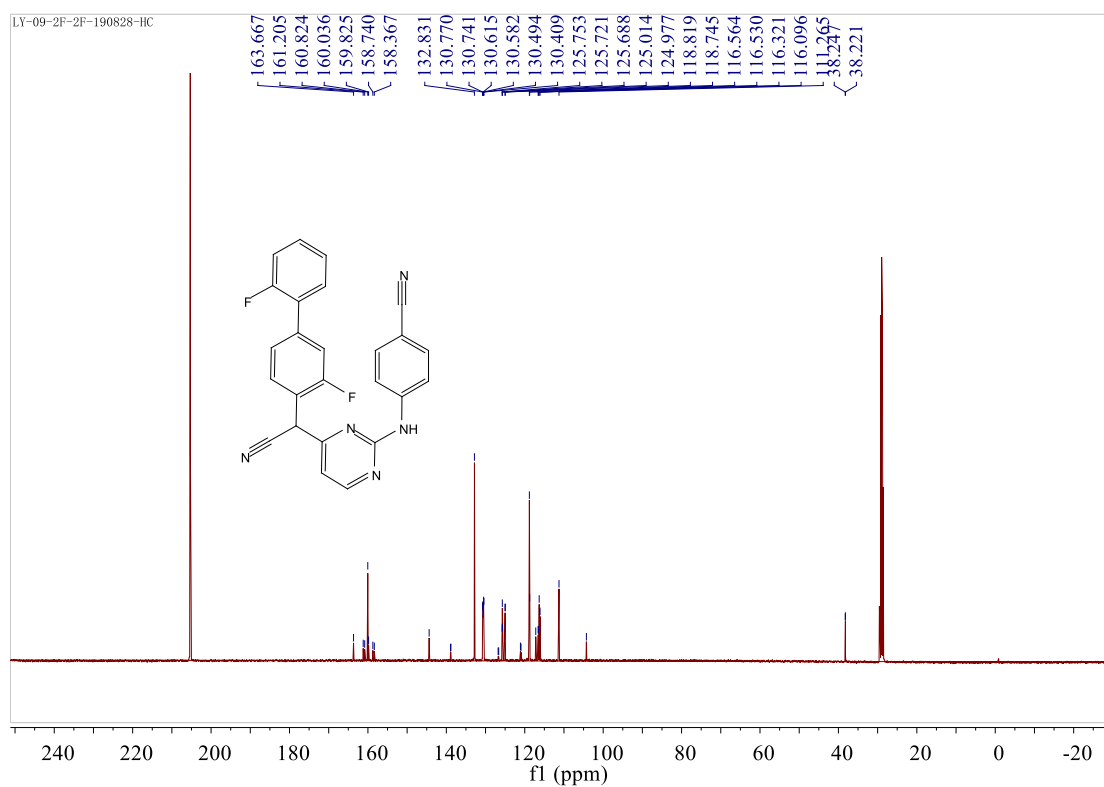

## Display Report

### Analysis Info

Analysis Name D:\Data\data\2019\2F-2F\_RD5\_01\_2862.d  
Method MS-2MIN-NEG.m  
Sample Name 2F-2F  
Comment

Acquisition Date 12/18/2019 17:08:37 PM  
Operator BDAL@DE  
Instrument compact 8255754.20127

### Acquisition Parameter

|             |          |                      |          |                  |           |
|-------------|----------|----------------------|----------|------------------|-----------|
| Source Type | ESI      | Ion Polarity         | Negative | Set Nebulizer    | 2.0 Bar   |
| Focus       | Active   | Set Capillary        | 2800 V   | Set Dry Heater   | 200 °C    |
| Scan Begin  | 50 m/z   | Set End Plate Offset | -500 V   | Set Dry Gas      | 8.0 l/min |
| Scan End    | 1500 m/z | Set Charging Voltage | 2000 V   | Set Divert Valve | Waste     |
|             |          | Set Corona           | 0 nA     | Set APCI Heater  | 0 °C      |

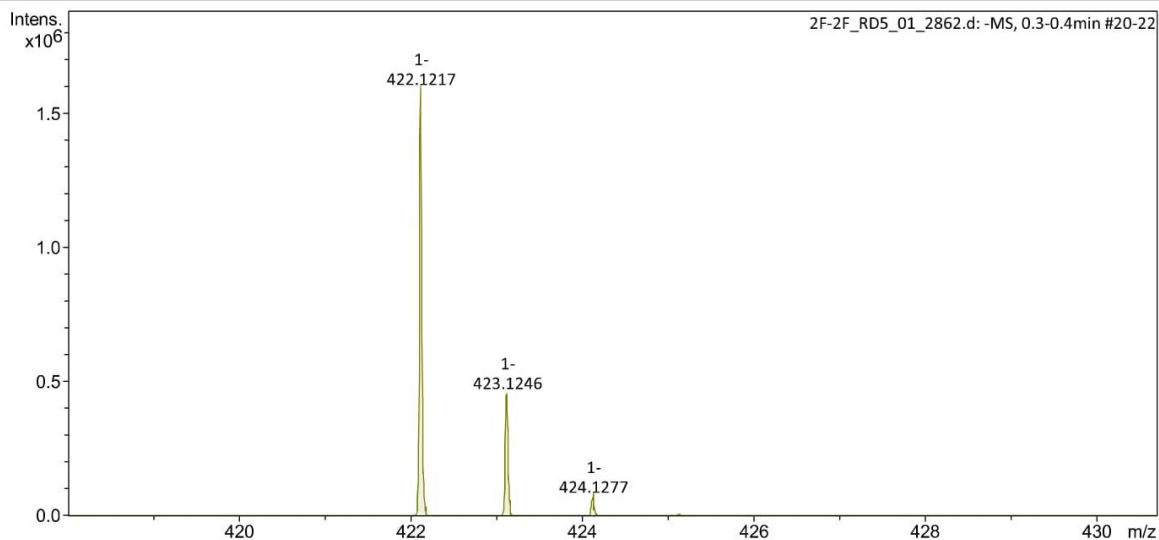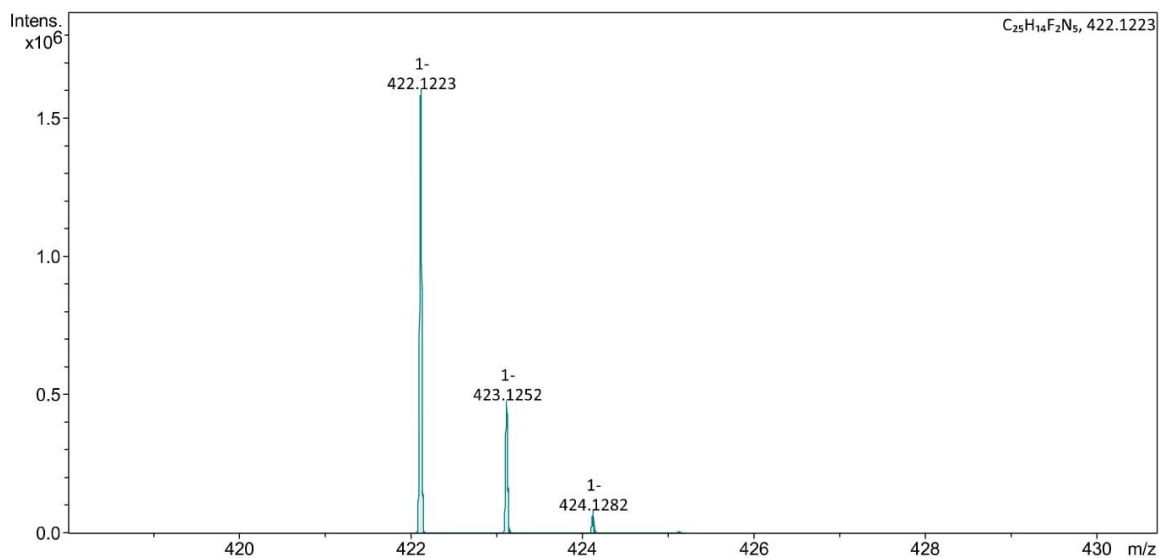

2F-2F\_RD5\_01\_2862.d

Bruker Compass DataAnalysis 4.3

printed: 12/19/2019 13:22:04 PM

by: BDAL@DE

Page 1 of 1

## 11. Spectra of compound 10k

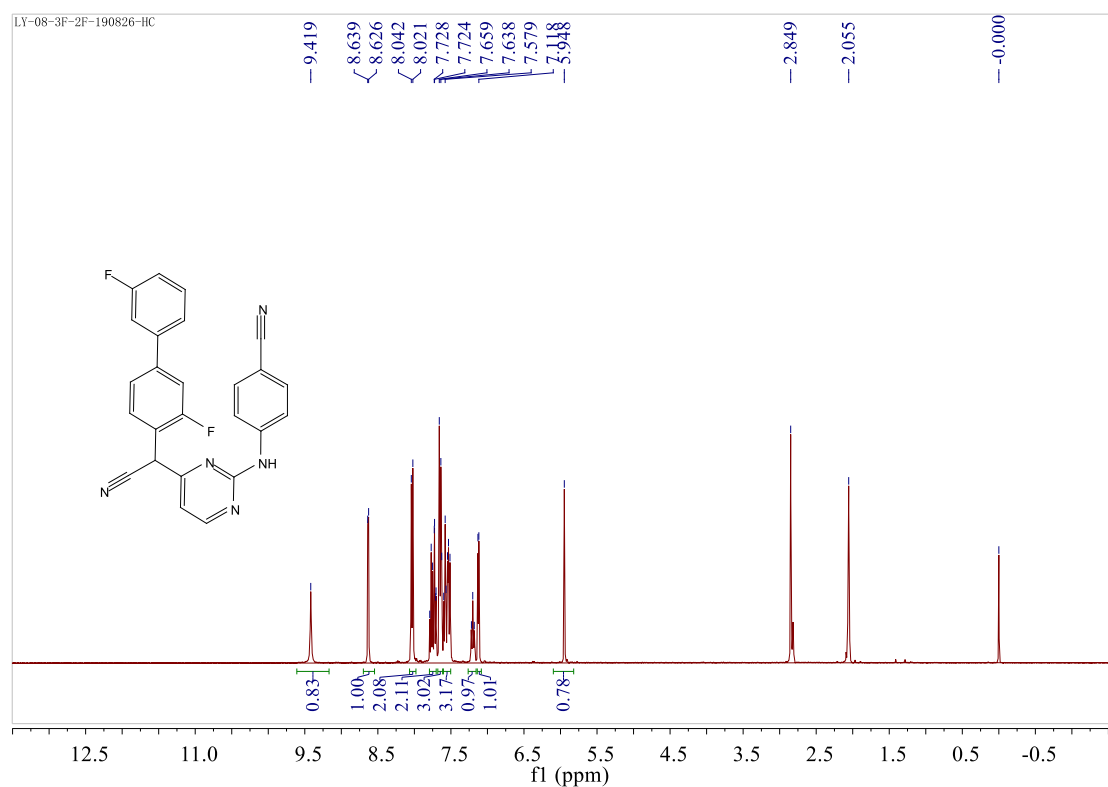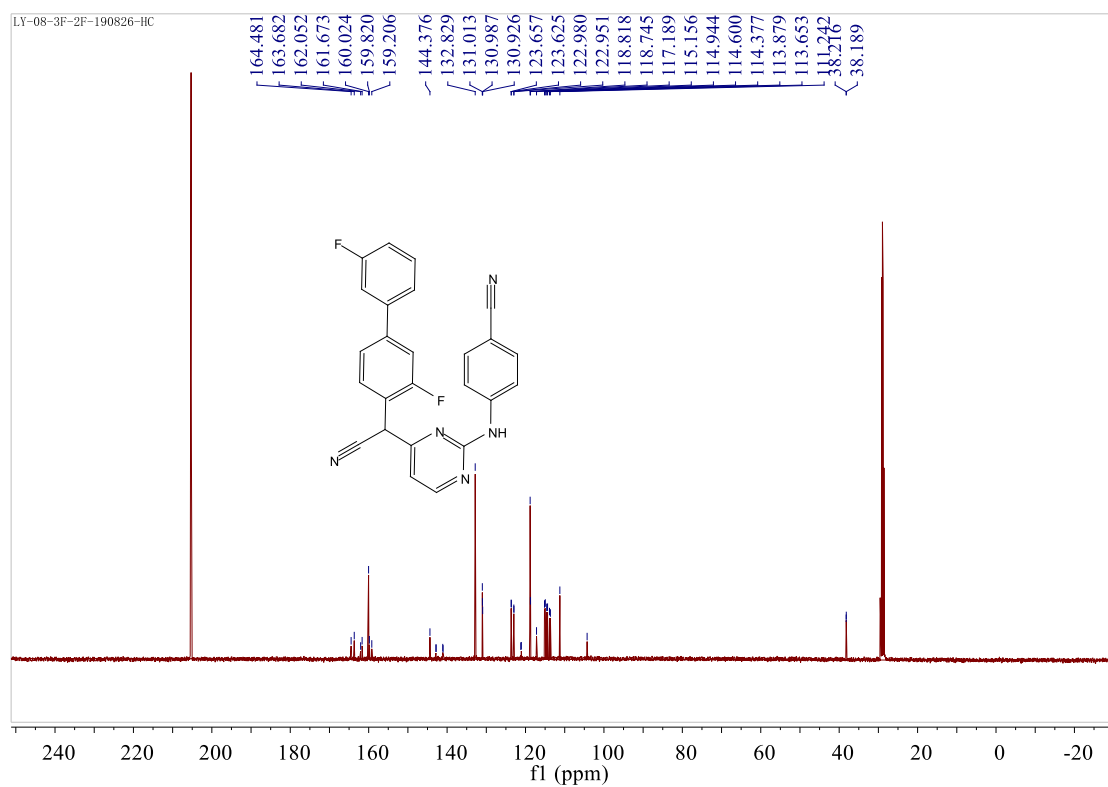

## Display Report

### Analysis Info

Analysis Name D:\Data\data\2019\LY-3F-2F\_RE6\_01\_2079.d  
Method MS-2MIN-POS-01.m  
Sample Name LY-3F-2F  
Comment

Acquisition Date 7/15/2019 16:34:05 PM  
Operator BDAL@DE  
Instrument compact 8255754.20127

### Acquisition Parameter

|             |          |                      |          |                  |           |
|-------------|----------|----------------------|----------|------------------|-----------|
| Source Type | ESI      | Ion Polarity         | Positive | Set Nebulizer    | 2.0 Bar   |
| Focus       | Active   | Set Capillary        | 4500 V   | Set Dry Heater   | 200 °C    |
| Scan Begin  | 50 m/z   | Set End Plate Offset | -500 V   | Set Dry Gas      | 8.0 l/min |
| Scan End    | 3000 m/z | Set Charging Voltage | 2000 V   | Set Divert Valve | Waste     |
|             |          | Set Corona           | 0 nA     | Set APCI Heater  | 0 °C      |

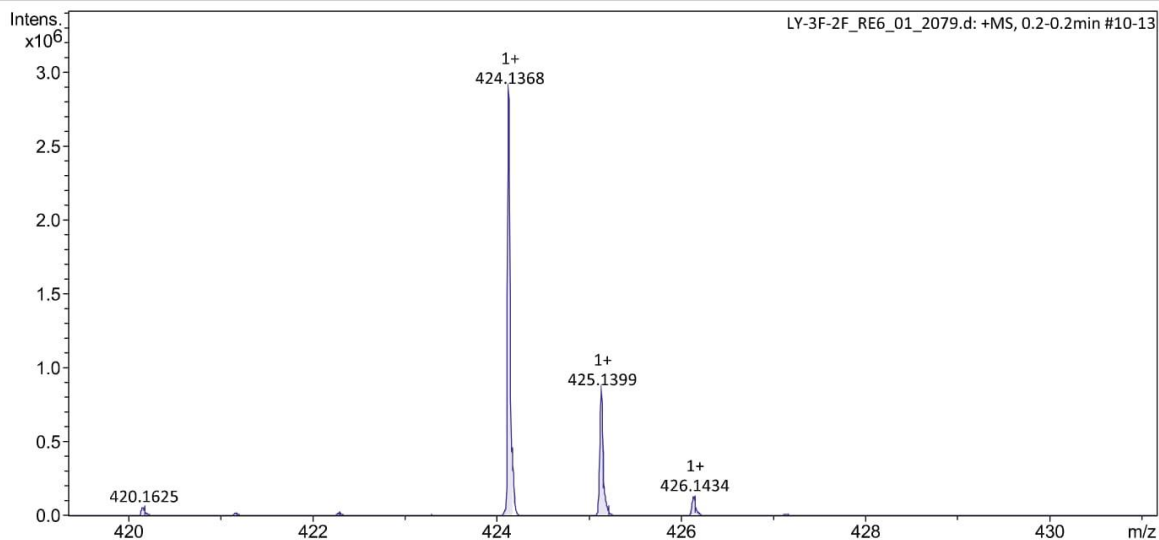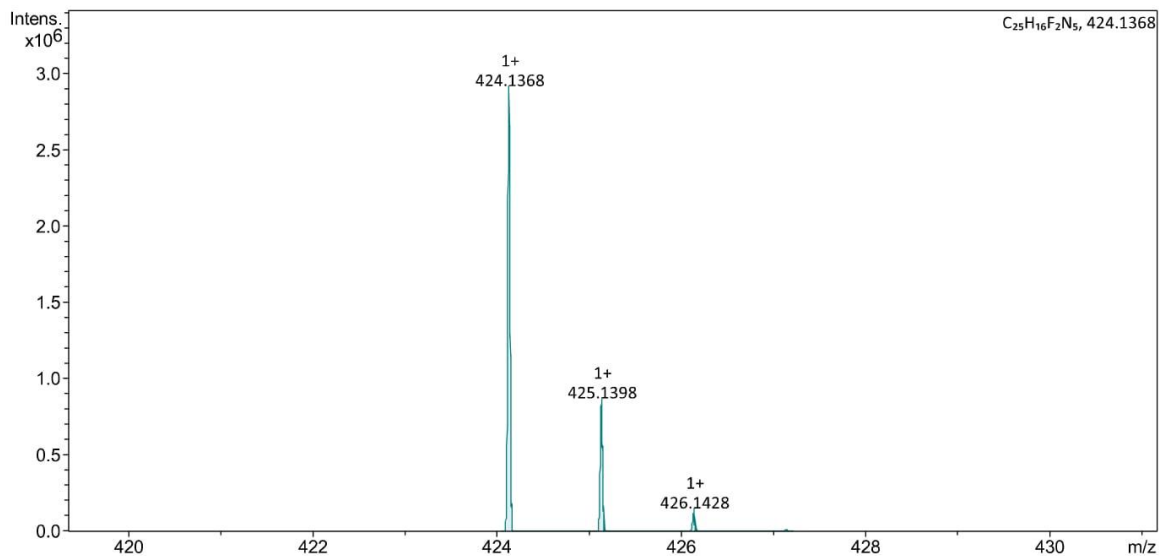

LY-3F-2F\_RE6\_01\_2079.d

Bruker Compass DataAnalysis 4.3

printed: 7/15/2019 16:48:19 PM

by: BDAL@DE

Page 1 of 1

## 12. Spectra of compound 10k

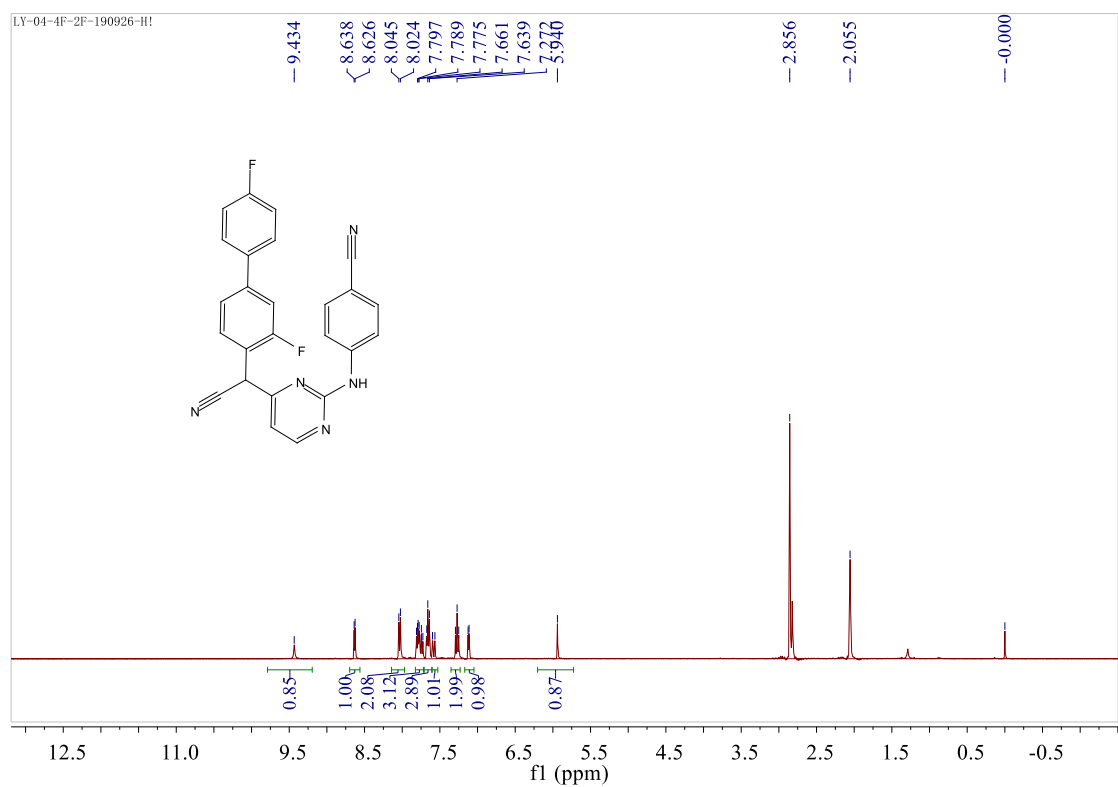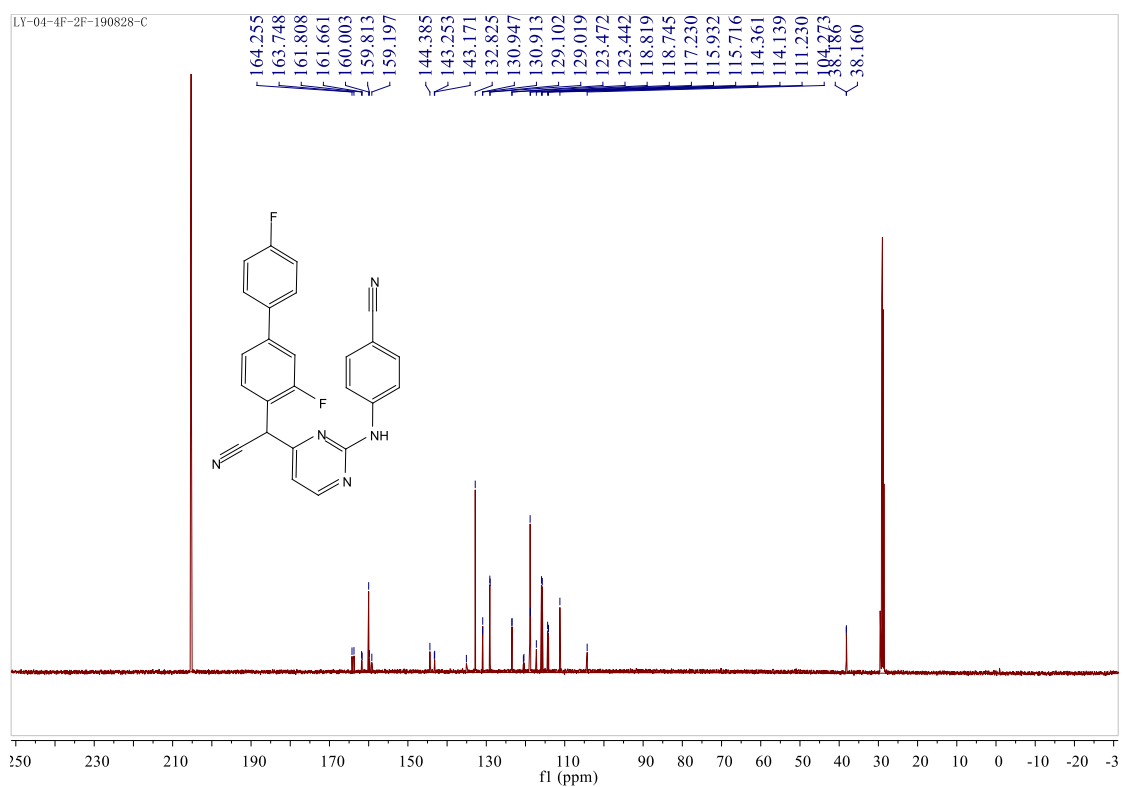



## Display Report

### Analysis Info

Analysis Name D:\Data\data\2019\4F-2F\_RD6\_01\_2861.d  
Method MS-2MIN-NEG.m  
Sample Name 4F-2F  
Comment

Acquisition Date 12/18/2019 17:05:51 PM  
Operator BDAL@DE  
Instrument compact 8255754.20127

### Acquisition Parameter

|             |          |                      |          |                  |           |
|-------------|----------|----------------------|----------|------------------|-----------|
| Source Type | ESI      | Ion Polarity         | Negative | Set Nebulizer    | 2.0 Bar   |
| Focus       | Active   | Set Capillary        | 2800 V   | Set Dry Heater   | 200 °C    |
| Scan Begin  | 50 m/z   | Set End Plate Offset | -500 V   | Set Dry Gas      | 8.0 l/min |
| Scan End    | 1500 m/z | Set Charging Voltage | 2000 V   | Set Divert Valve | Waste     |
|             |          | Set Corona           | 0 nA     | Set APCI Heater  | 0 °C      |

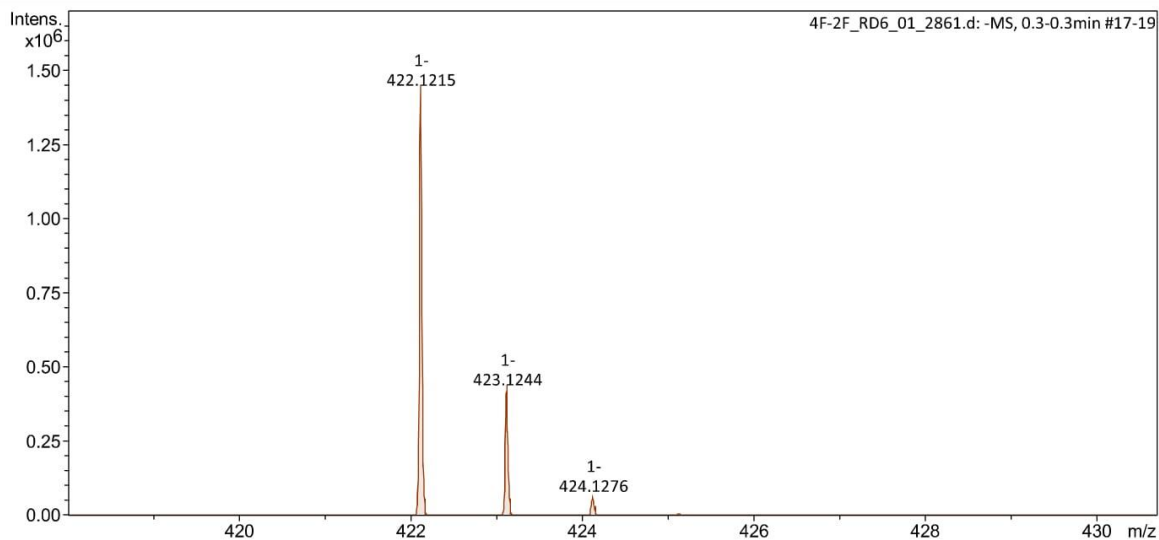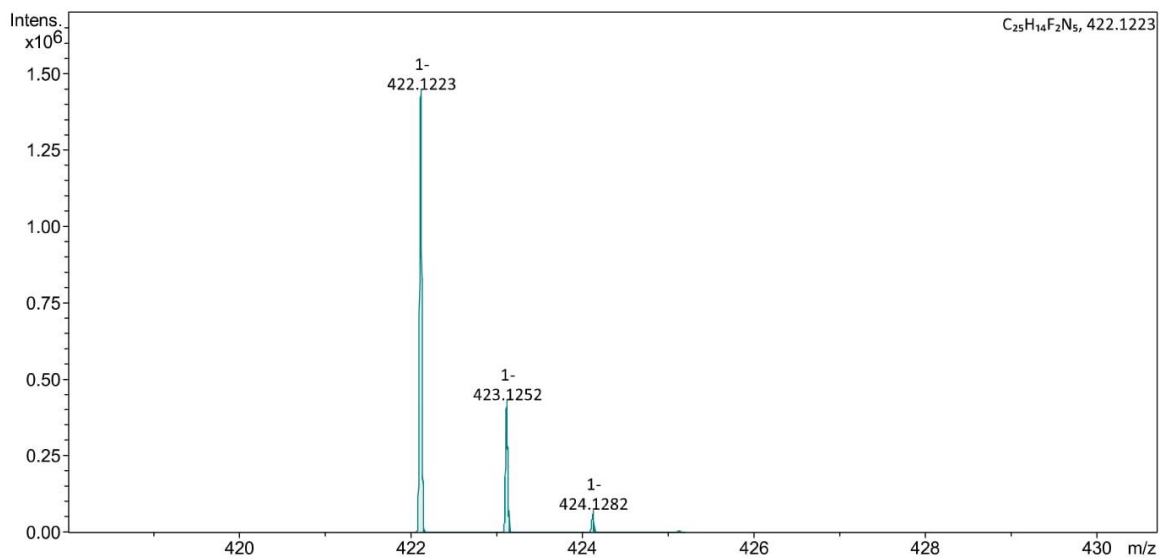

4F-2F\_RD6\_01\_2861.d

Bruker Compass DataAnalysis 4.3

printed: 12/19/2019 13:20:06 PM

by: BDAL@DE

Page 1 of 1

### 13. Spectra of compound 10m

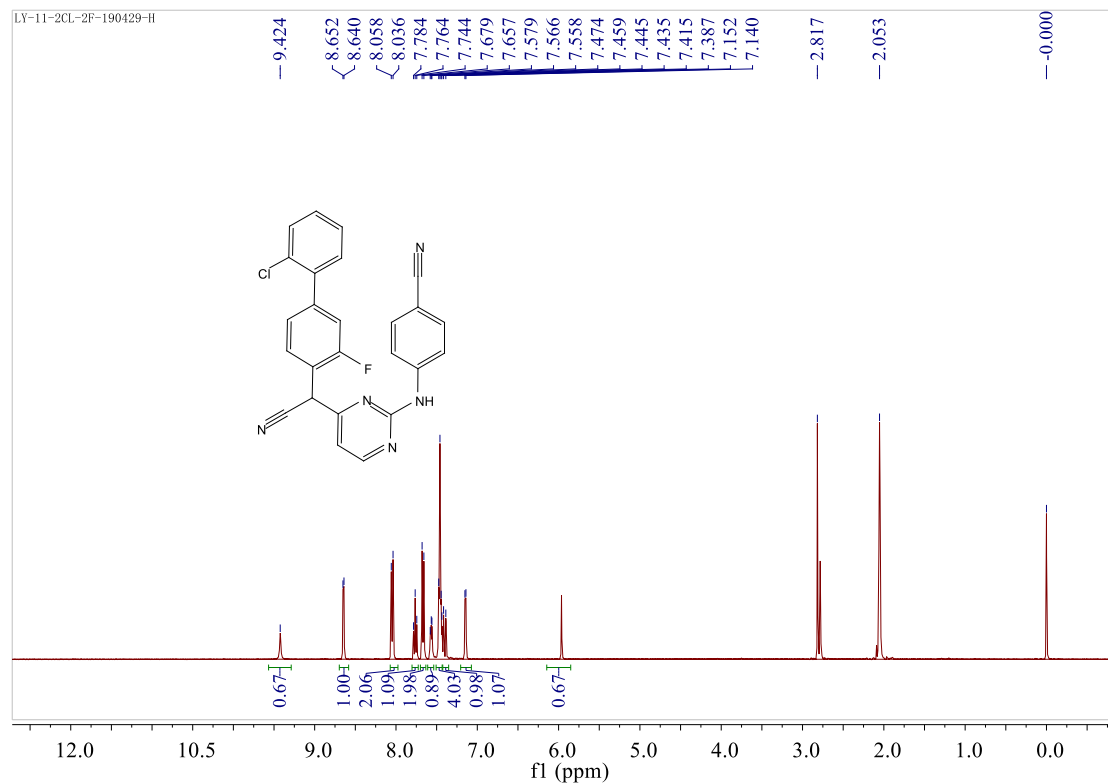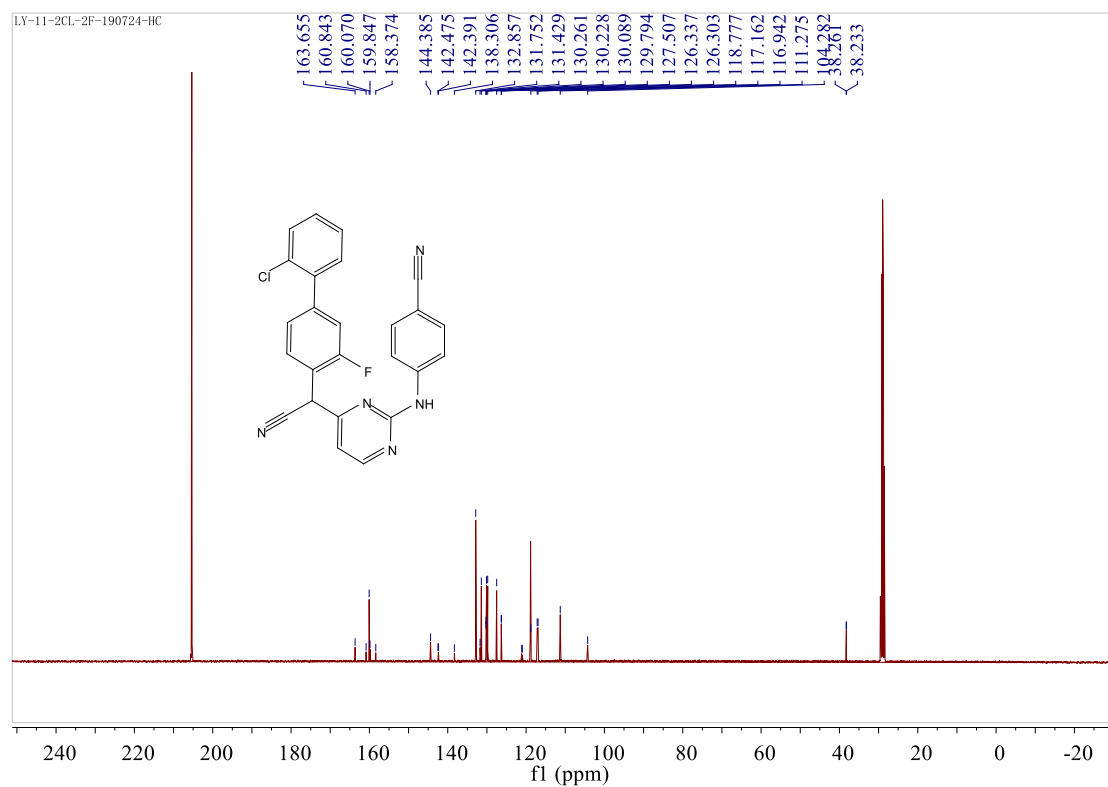

## Display Report

### Analysis Info

Analysis Name D:\Data\data\2019\2CL-2F\_RD8\_01\_2859.d  
Method MS-2MIN-NEG.m  
Sample Name 2CL-2F  
Comment

Acquisition Date 12/18/2019 17:00:20 PM  
Operator BDAL@DE  
Instrument compact 8255754.20127

### Acquisition Parameter

|             |          |                      |          |                  |           |
|-------------|----------|----------------------|----------|------------------|-----------|
| Source Type | ESI      | Ion Polarity         | Negative | Set Nebulizer    | 2.0 Bar   |
| Focus       | Active   | Set Capillary        | 2800 V   | Set Dry Heater   | 200 °C    |
| Scan Begin  | 50 m/z   | Set End Plate Offset | -500 V   | Set Dry Gas      | 8.0 l/min |
| Scan End    | 1500 m/z | Set Charging Voltage | 2000 V   | Set Divert Valve | Waste     |
|             |          | Set Corona           | 0 nA     | Set APCI Heater  | 0 °C      |

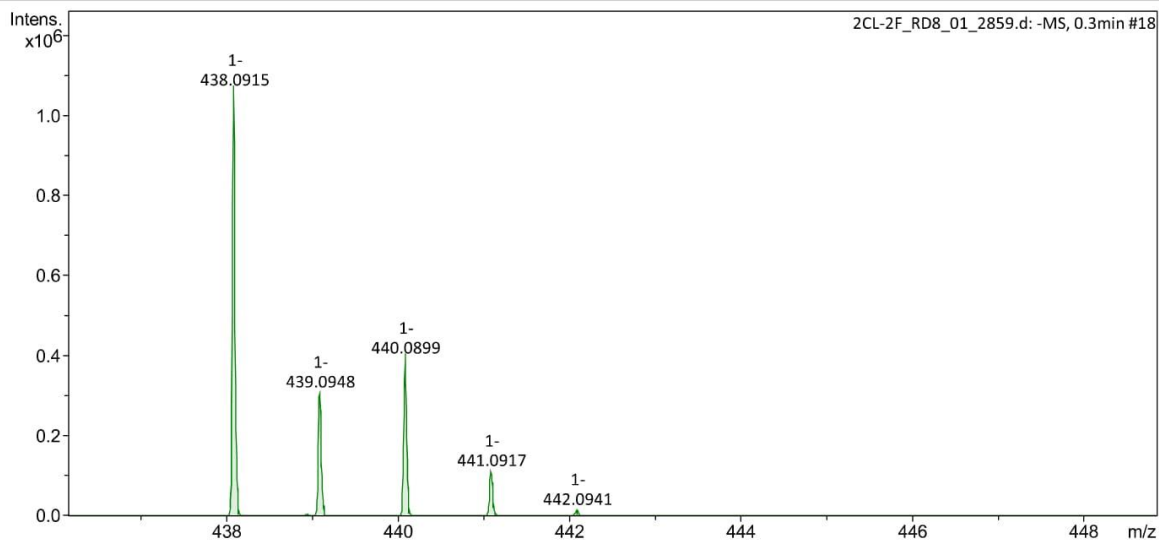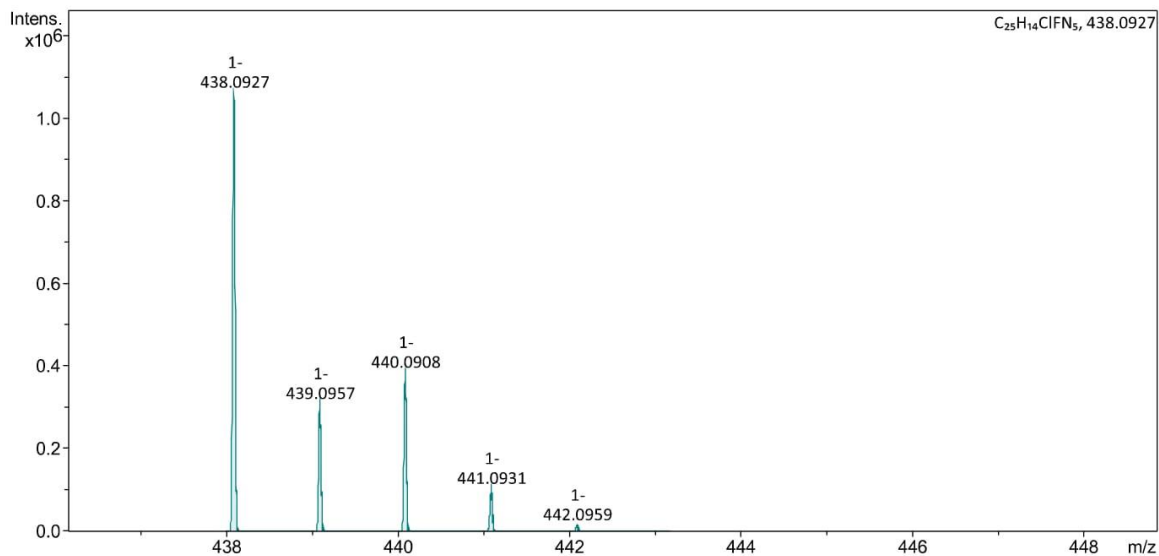

2CL-2F\_RD8\_01\_2859.d

Bruker Compass DataAnalysis 4.3

printed: 12/19/2019 13:14:27 PM

by: BDAL@DE

Page 1 of 1

## 14. Spectra of compound 10n

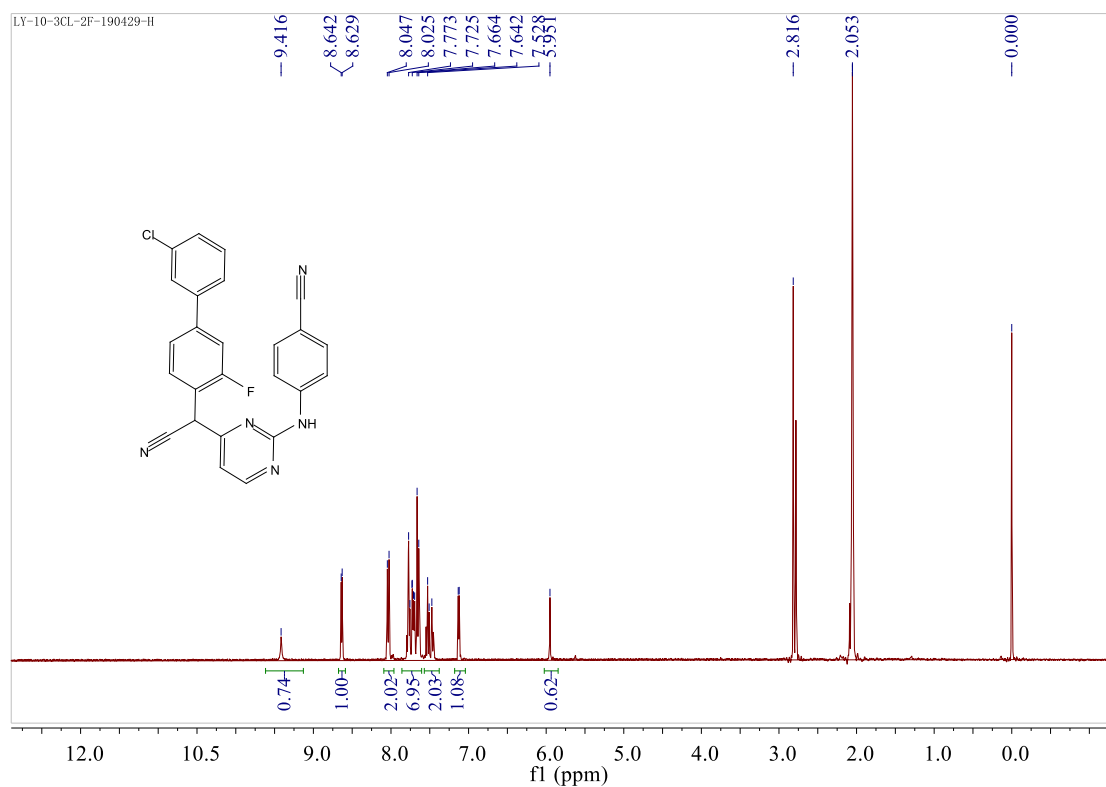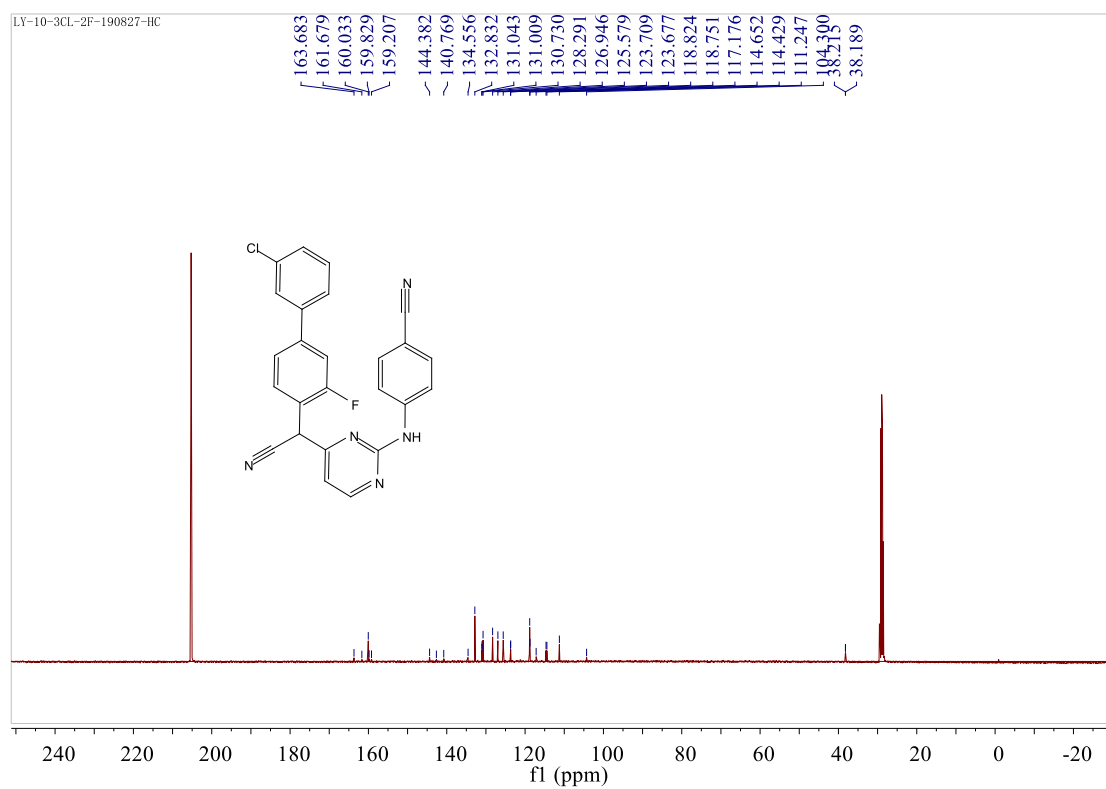

## Display Report

### Analysis Info

Analysis Name D:\Data\data\2019\3CL-2F\_RC6\_01\_2869.d  
Method MS-2MIN-NEG.m  
Sample Name 3CL-2F  
Comment

Acquisition Date 12/18/2019 17:27:57 PM  
Operator BDAL@DE  
Instrument compact 8255754.20127

### Acquisition Parameter

|             |          |                      |          |                  |           |
|-------------|----------|----------------------|----------|------------------|-----------|
| Source Type | ESI      | Ion Polarity         | Negative | Set Nebulizer    | 2.0 Bar   |
| Focus       | Active   | Set Capillary        | 2800 V   | Set Dry Heater   | 200 °C    |
| Scan Begin  | 50 m/z   | Set End Plate Offset | -500 V   | Set Dry Gas      | 8.0 l/min |
| Scan End    | 1500 m/z | Set Charging Voltage | 2000 V   | Set Divert Valve | Waste     |
|             |          | Set Corona           | 0 nA     | Set APCI Heater  | 0 °C      |

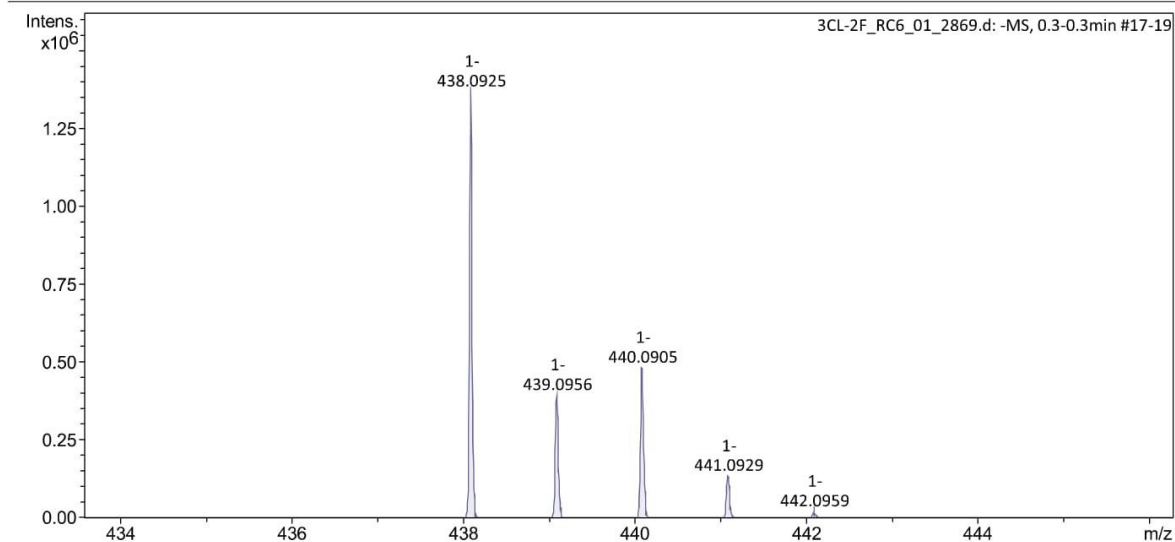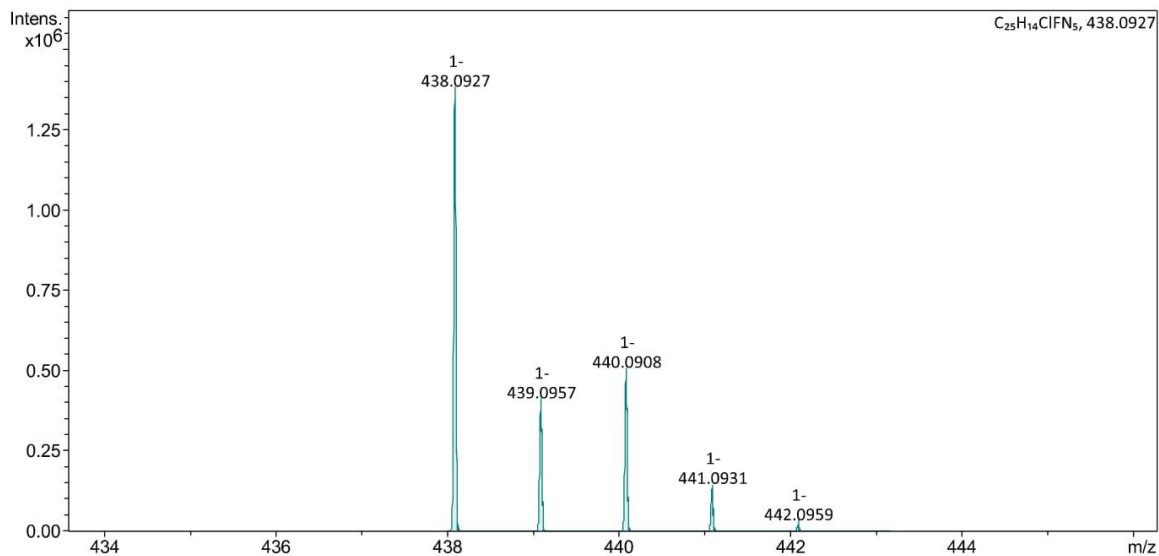

3CL-2F\_RC6\_01\_2869.d

Bruker Compass DataAnalysis 4.3

printed: 12/19/2019 13:09:29 PM

by: BDAL@DE

Page 1 of 1

## 15. Spectra of compound 10o

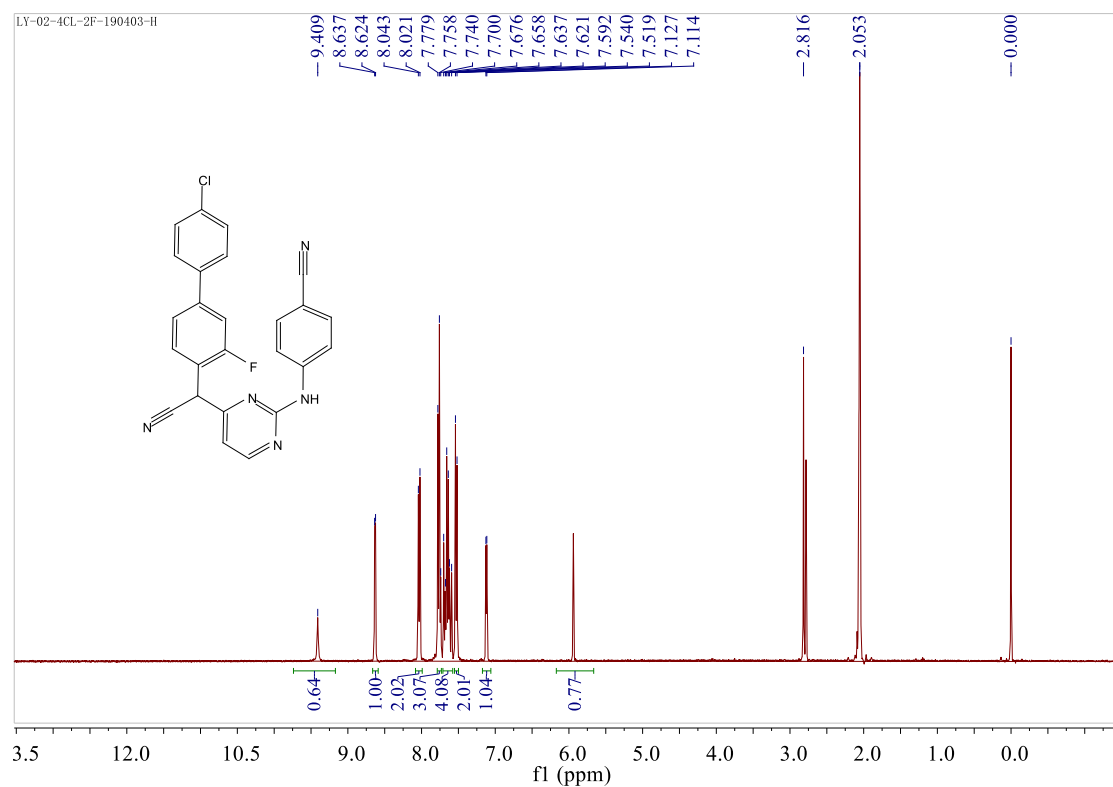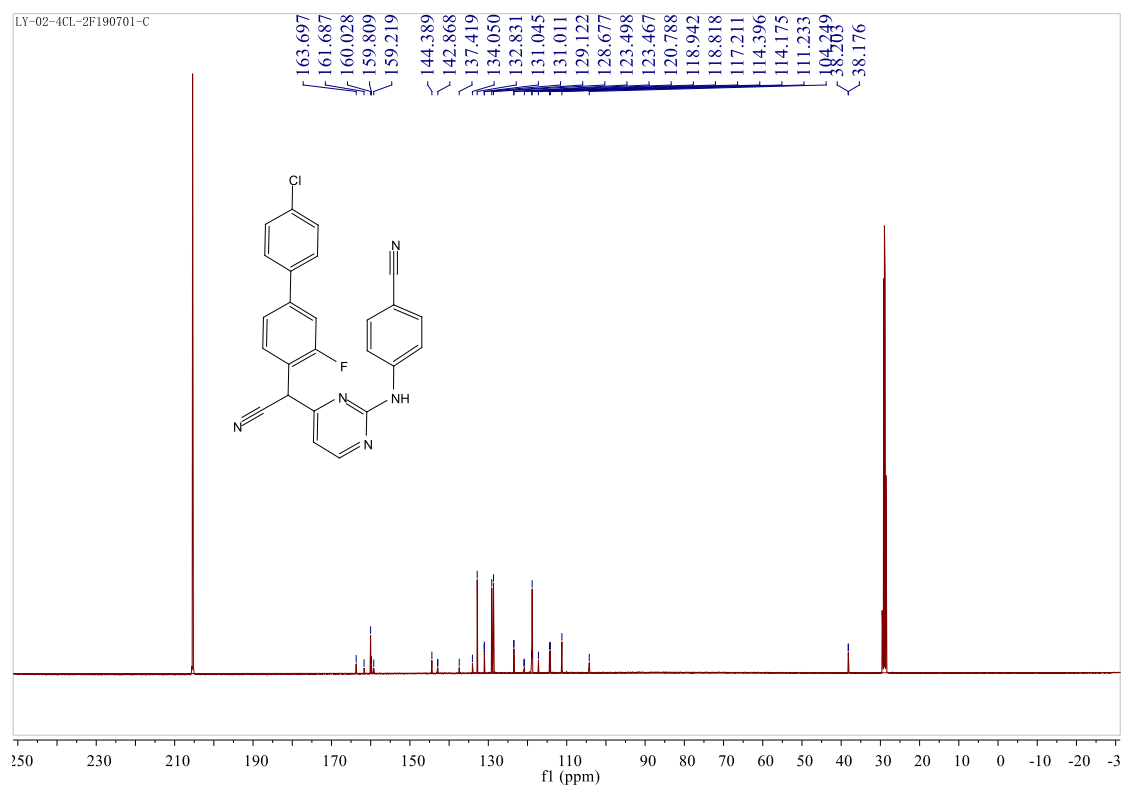

# Display Report

## Analysis Info

Analysis Name D:\Data\data\2019\4CL-2F\_RD7\_01\_2860.d  
Method MS-2MIN-NEG.m  
Sample Name 4CL-2F  
Comment

Acquisition Date 12/18/2019 17:03:06 PM  
Operator BDAL@DE  
Instrument compact 8255754.20127

## Acquisition Parameter

|             |          |                      |          |                  |           |
|-------------|----------|----------------------|----------|------------------|-----------|
| Source Type | ESI      | Ion Polarity         | Negative | Set Nebulizer    | 2.0 Bar   |
| Focus       | Active   | Set Capillary        | 2800 V   | Set Dry Heater   | 200 °C    |
| Scan Begin  | 50 m/z   | Set End Plate Offset | -500 V   | Set Dry Gas      | 8.0 l/min |
| Scan End    | 1500 m/z | Set Charging Voltage | 2000 V   | Set Divert Valve | Waste     |
|             |          | Set Corona           | 0 nA     | Set APCI Heater  | 0 °C      |

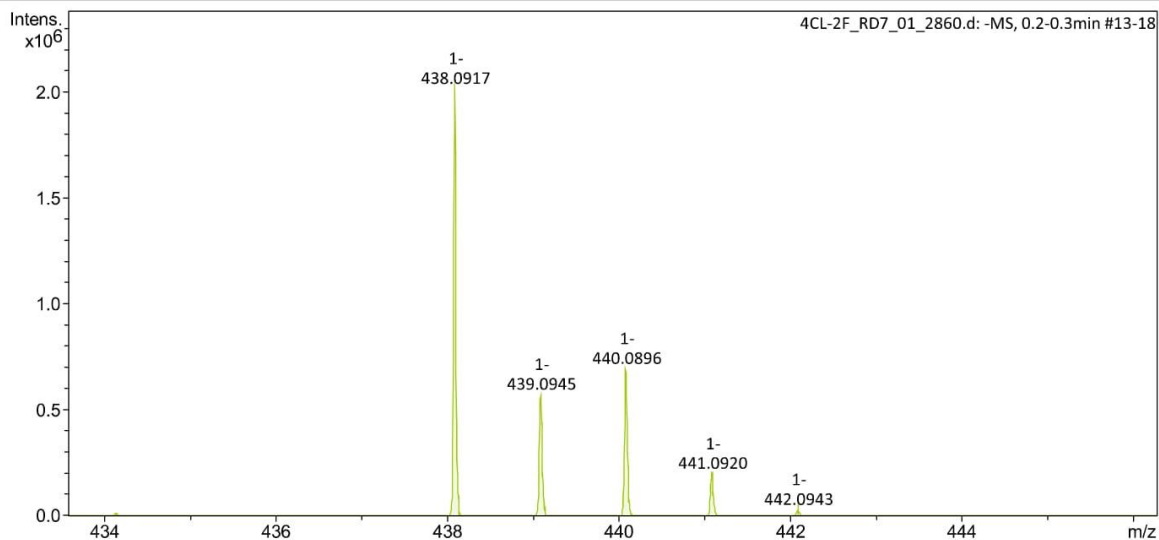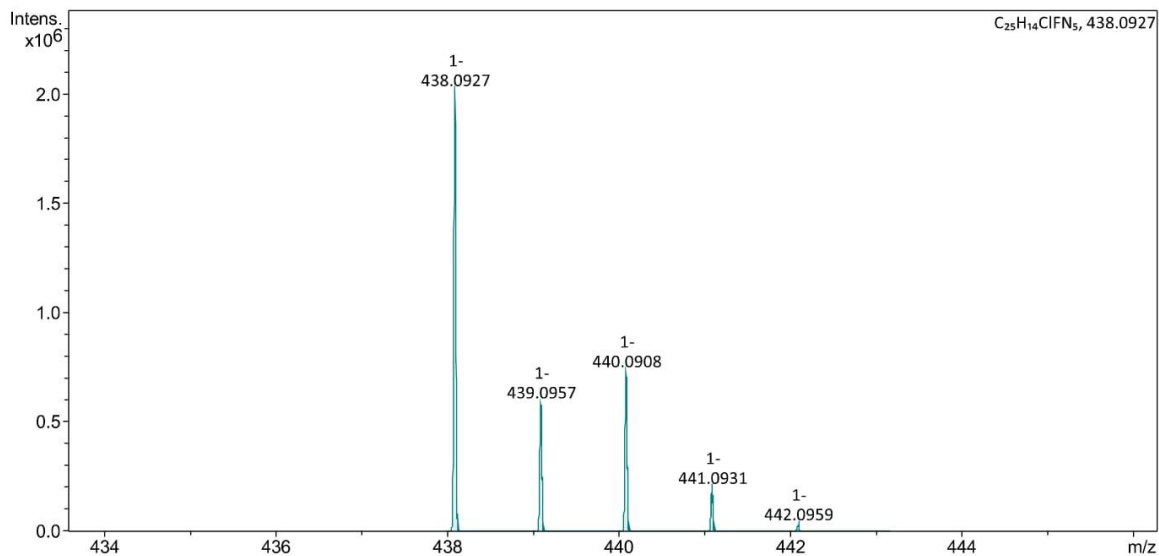

4CL-2F\_RD7\_01\_2860.d

Bruker Compass DataAnalysis 4.3

printed: 12/19/2019 13:11:48 PM

by: BDAL@DE

Page 1 of 1

## 16. Spectra of compound 10p

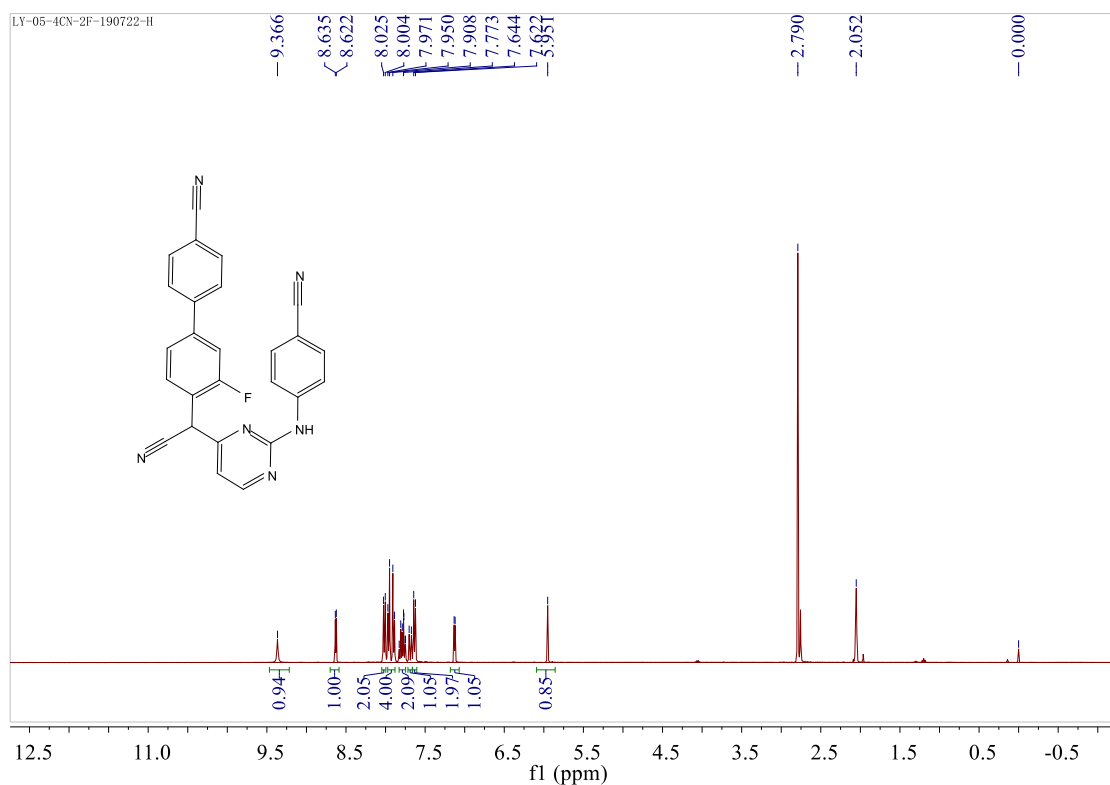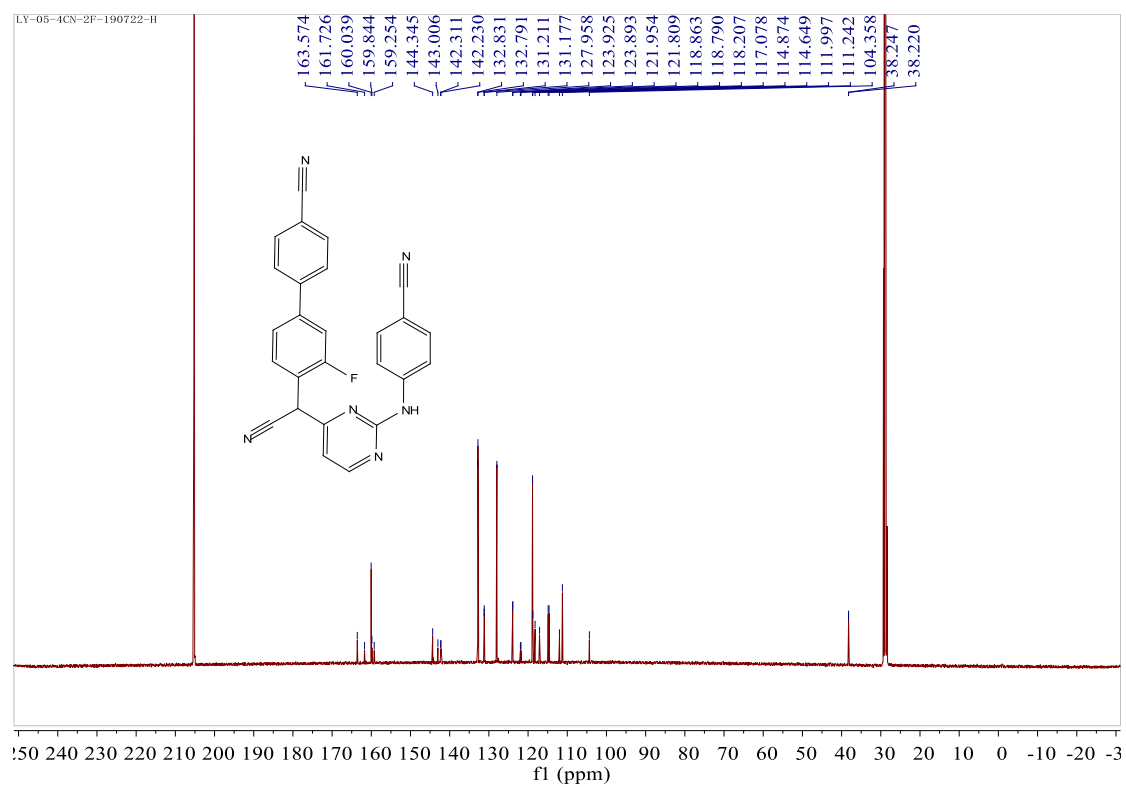



## Display Report

### Analysis Info

Analysis Name D:\Data\data\2019\LY191212-4CN-2F\_GD8\_01\_2850.d  
Method MS-2MIN-NEG.m  
Sample Name LY191212-4CN-2F  
Comment

Acquisition Date 12/18/2019 12:26:12 PM  
Operator BDAL@DE  
Instrument compact 8255754.20127

### Acquisition Parameter

|             |          |                      |          |                  |           |
|-------------|----------|----------------------|----------|------------------|-----------|
| Source Type | ESI      | Ion Polarity         | Negative | Set Nebulizer    | 2.0 Bar   |
| Focus       | Active   | Set Capillary        | 2800 V   | Set Dry Heater   | 200 °C    |
| Scan Begin  | 50 m/z   | Set End Plate Offset | -500 V   | Set Dry Gas      | 8.0 l/min |
| Scan End    | 1500 m/z | Set Charging Voltage | 2000 V   | Set Divert Valve | Waste     |
|             |          | Set Corona           | 0 nA     | Set APCI Heater  | 0 °C      |

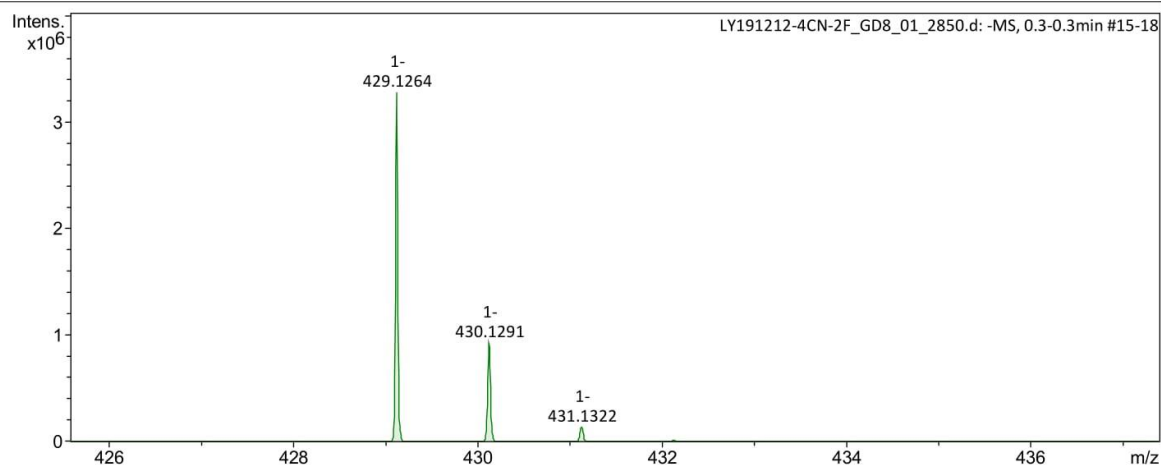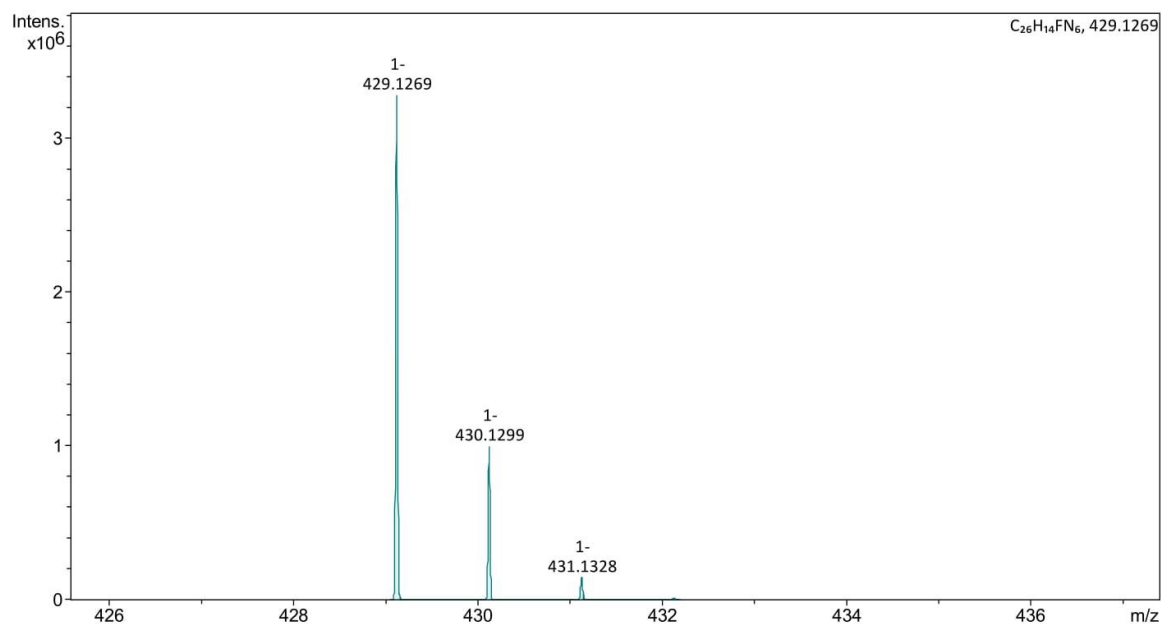

LY191212-4CN-2F\_GD8\_01\_2850.d  
Bruker Compass DataAnalysis 4.3

printed: 1/7/2020 11:20:30 AM

by: BDAL@DE

Page 1 of 1
